# Supplementary material
Source: bioRxiv or medRxiv preprint supplement (https://www.biorxiv.org/highwire/filestream/70863/field_highwire_adjunct_files/0/231696-1.pdf)
Supplement: Supplementary file [file 231696-1.pdf]

Supplemental Materials

**The functional organization of descending sensory-motor pathways in *Drosophila***

Shigehiro Namiki,<sup>1</sup> Michael H. Dickinson,<sup>2</sup> Allan M. Wong,<sup>1</sup> Wyatt Korff,<sup>1</sup> Gwyneth M. Card,<sup>1,\*</sup>

<sup>1</sup>*Janelia Research Campus, Howard Hughes Medical Institute, Ashburn, VA 20147, USA*

<sup>2</sup>*Division of Biology and Bioengineering, California Institute of Technology, Pasadena, CA 91125, USA*

\*Correspondence should be addressed to [cardg@janelia.hhmi.org](mailto:cardg@janelia.hhmi.org) (G.M.C)

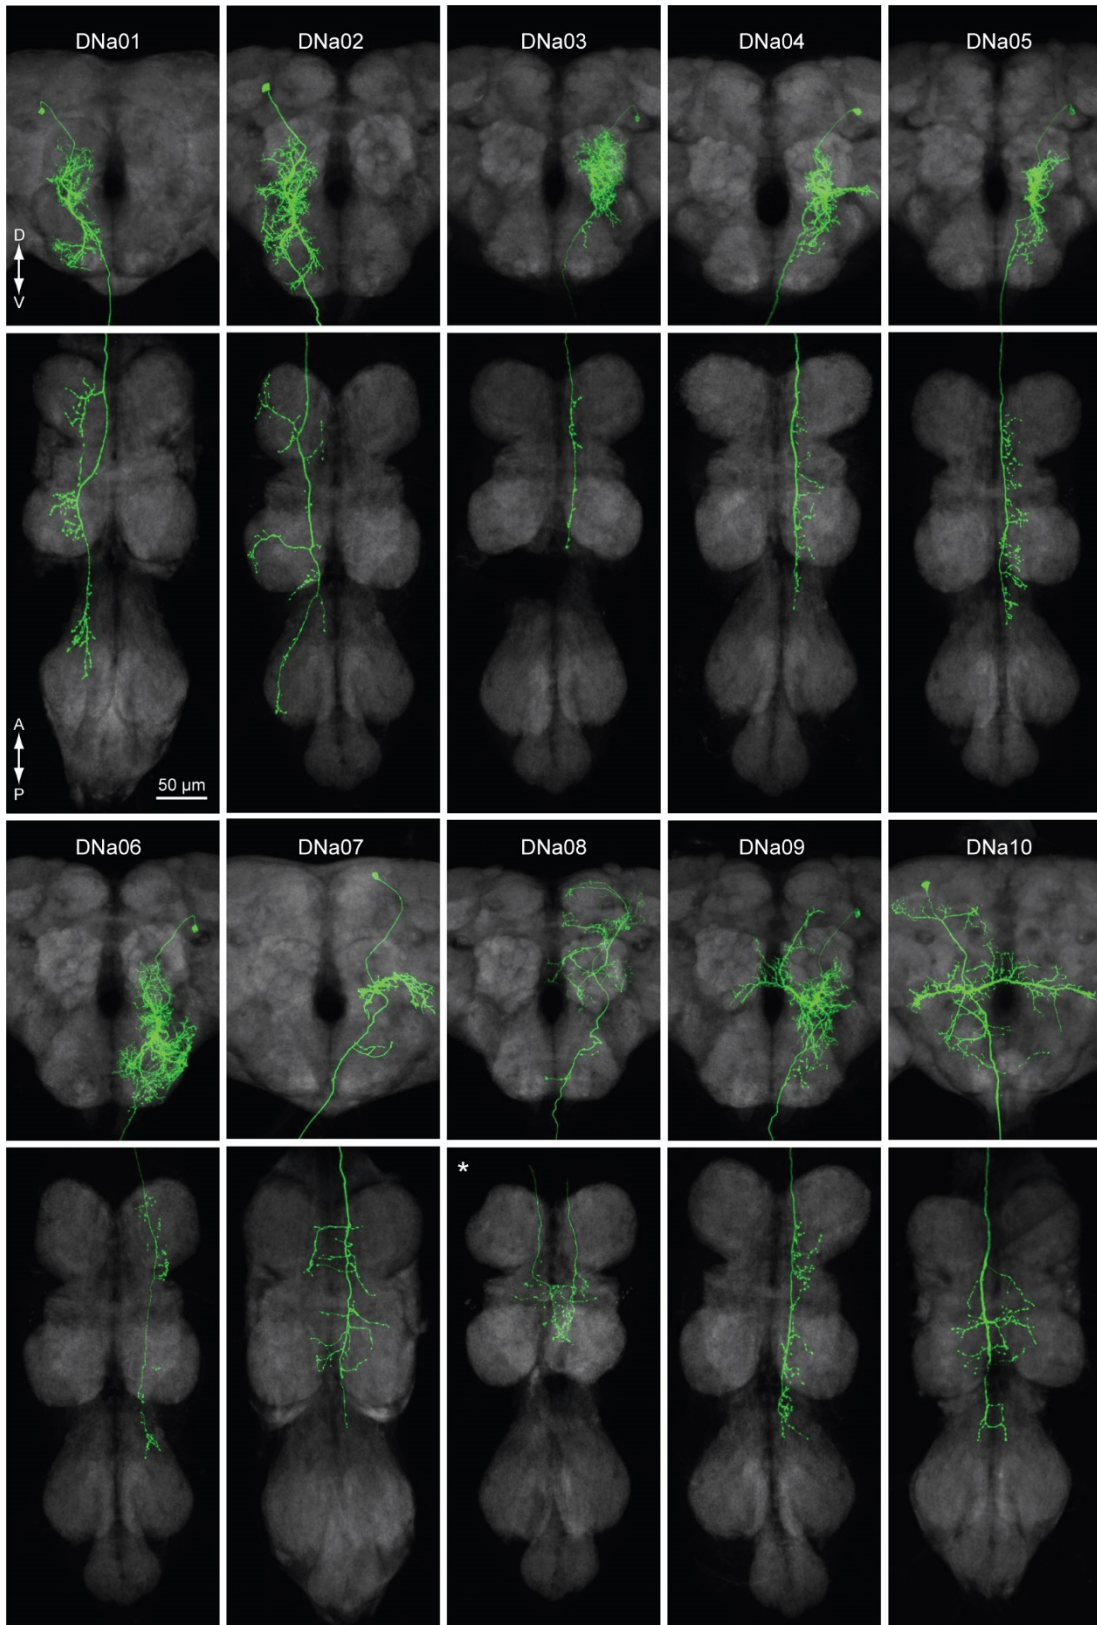



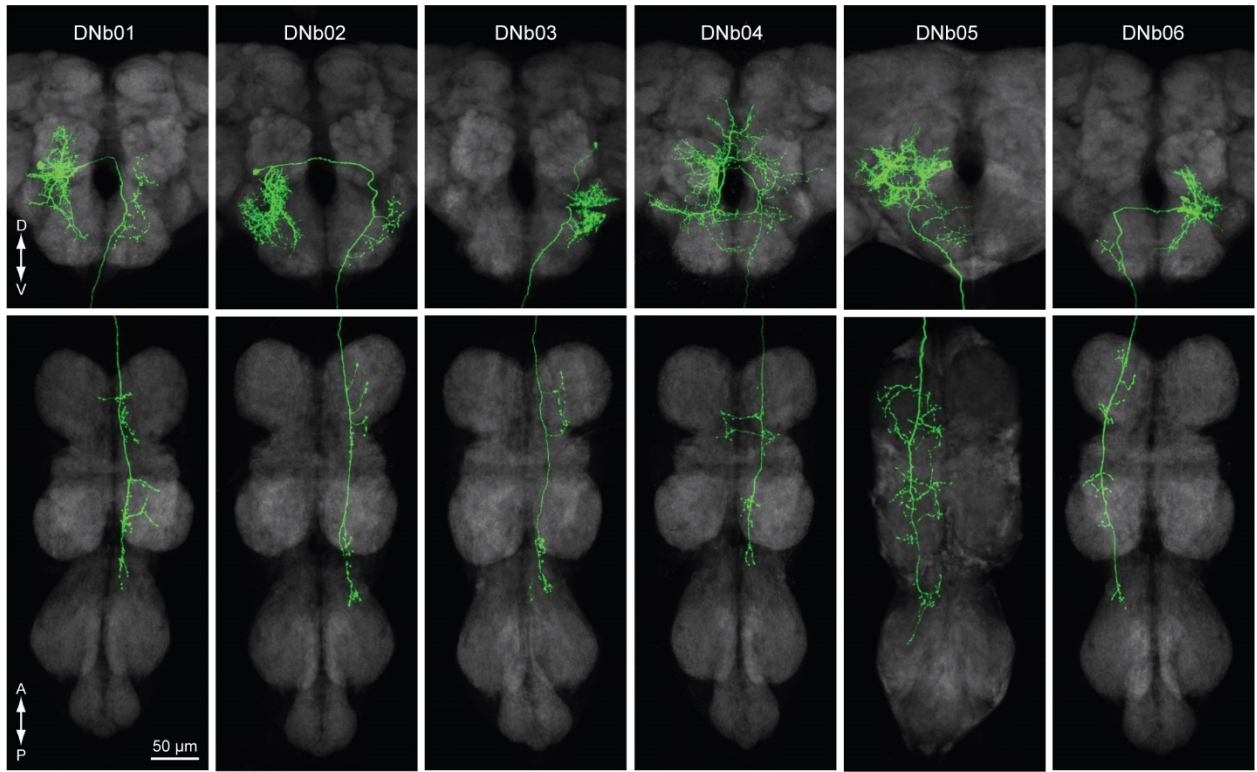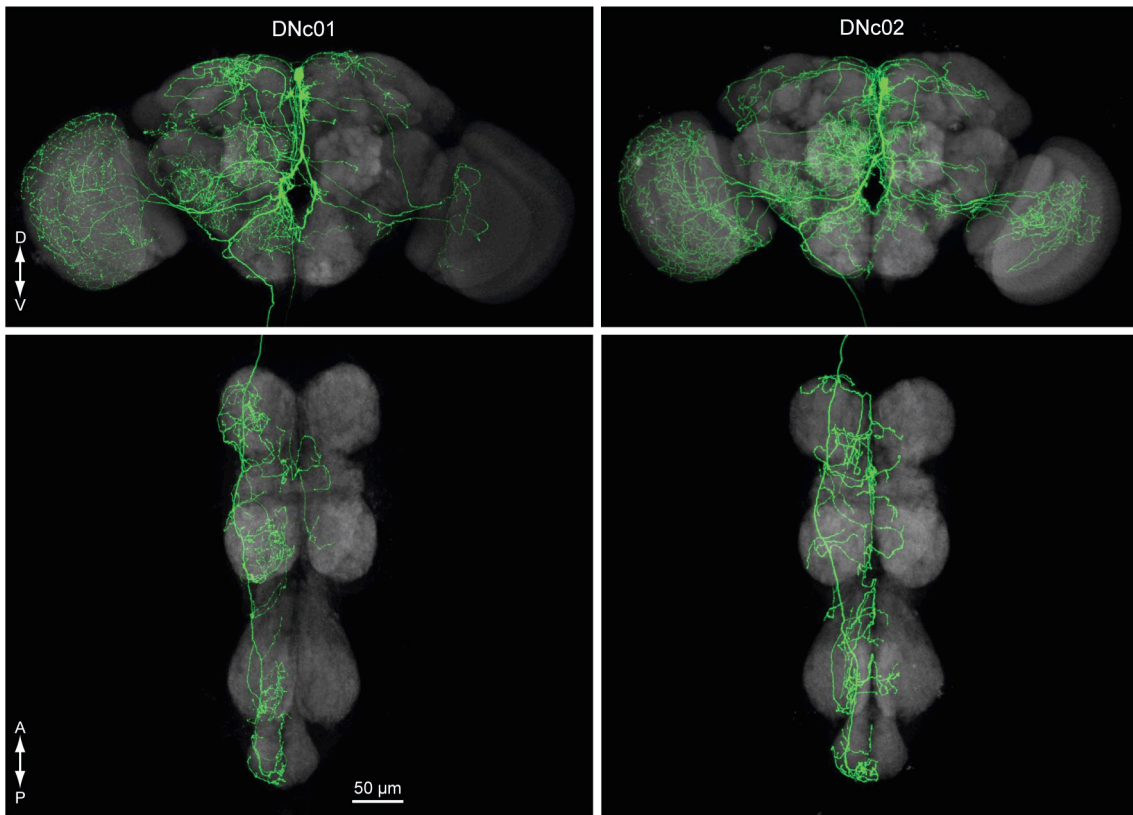

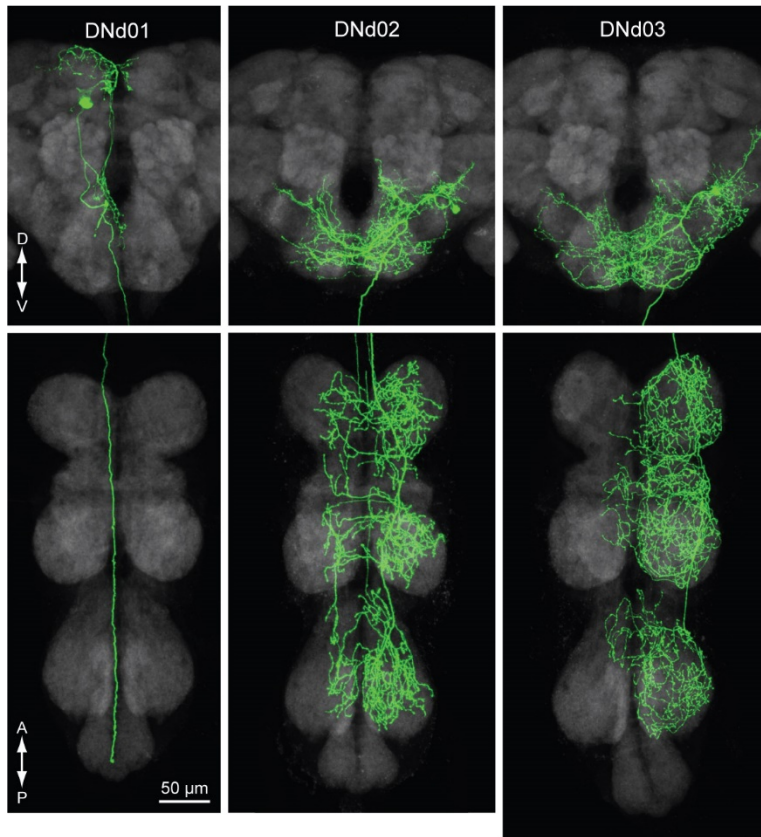

**Figure 2. Figure supplement 1. Morphology of DNs (1/4).**

Morphology of identified DNs, groups a-d. Images are masks for single DNs made from maximum intensity projections of confocal images for sparse split lines. Shown here as horizontal views of the brain (*top*) and VNC (*bottom*).

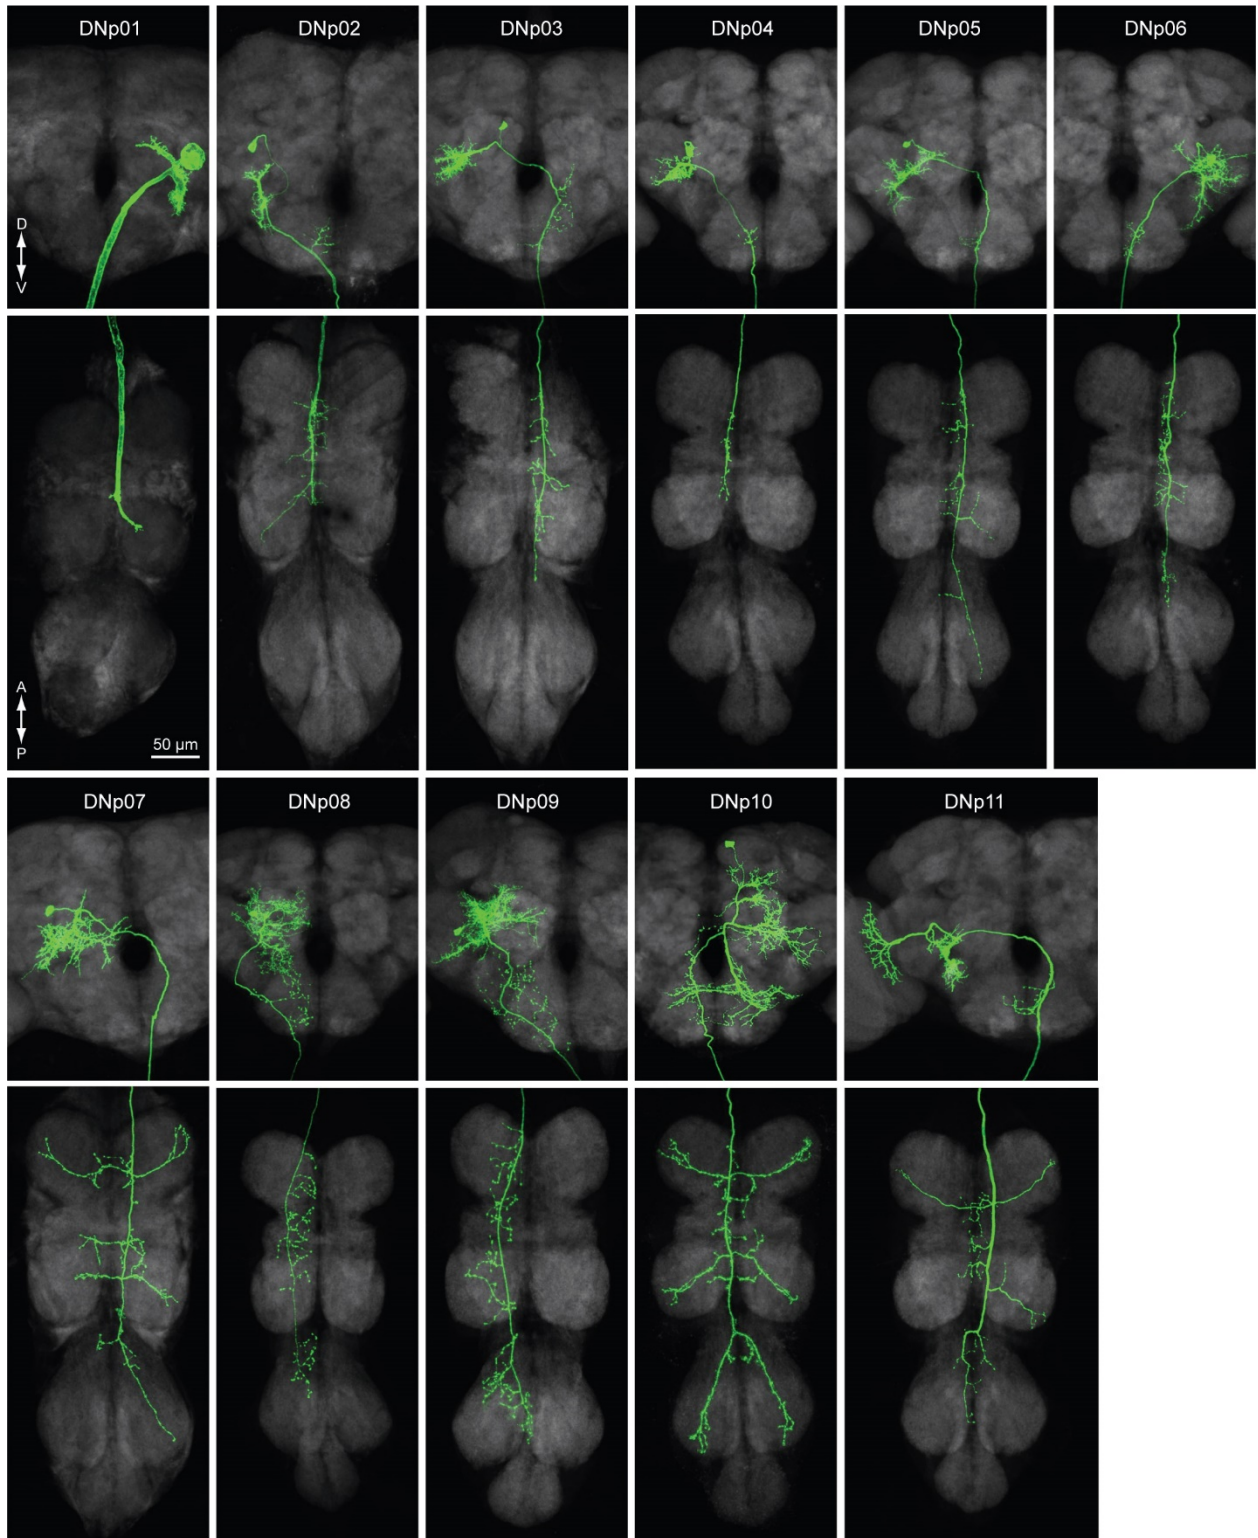



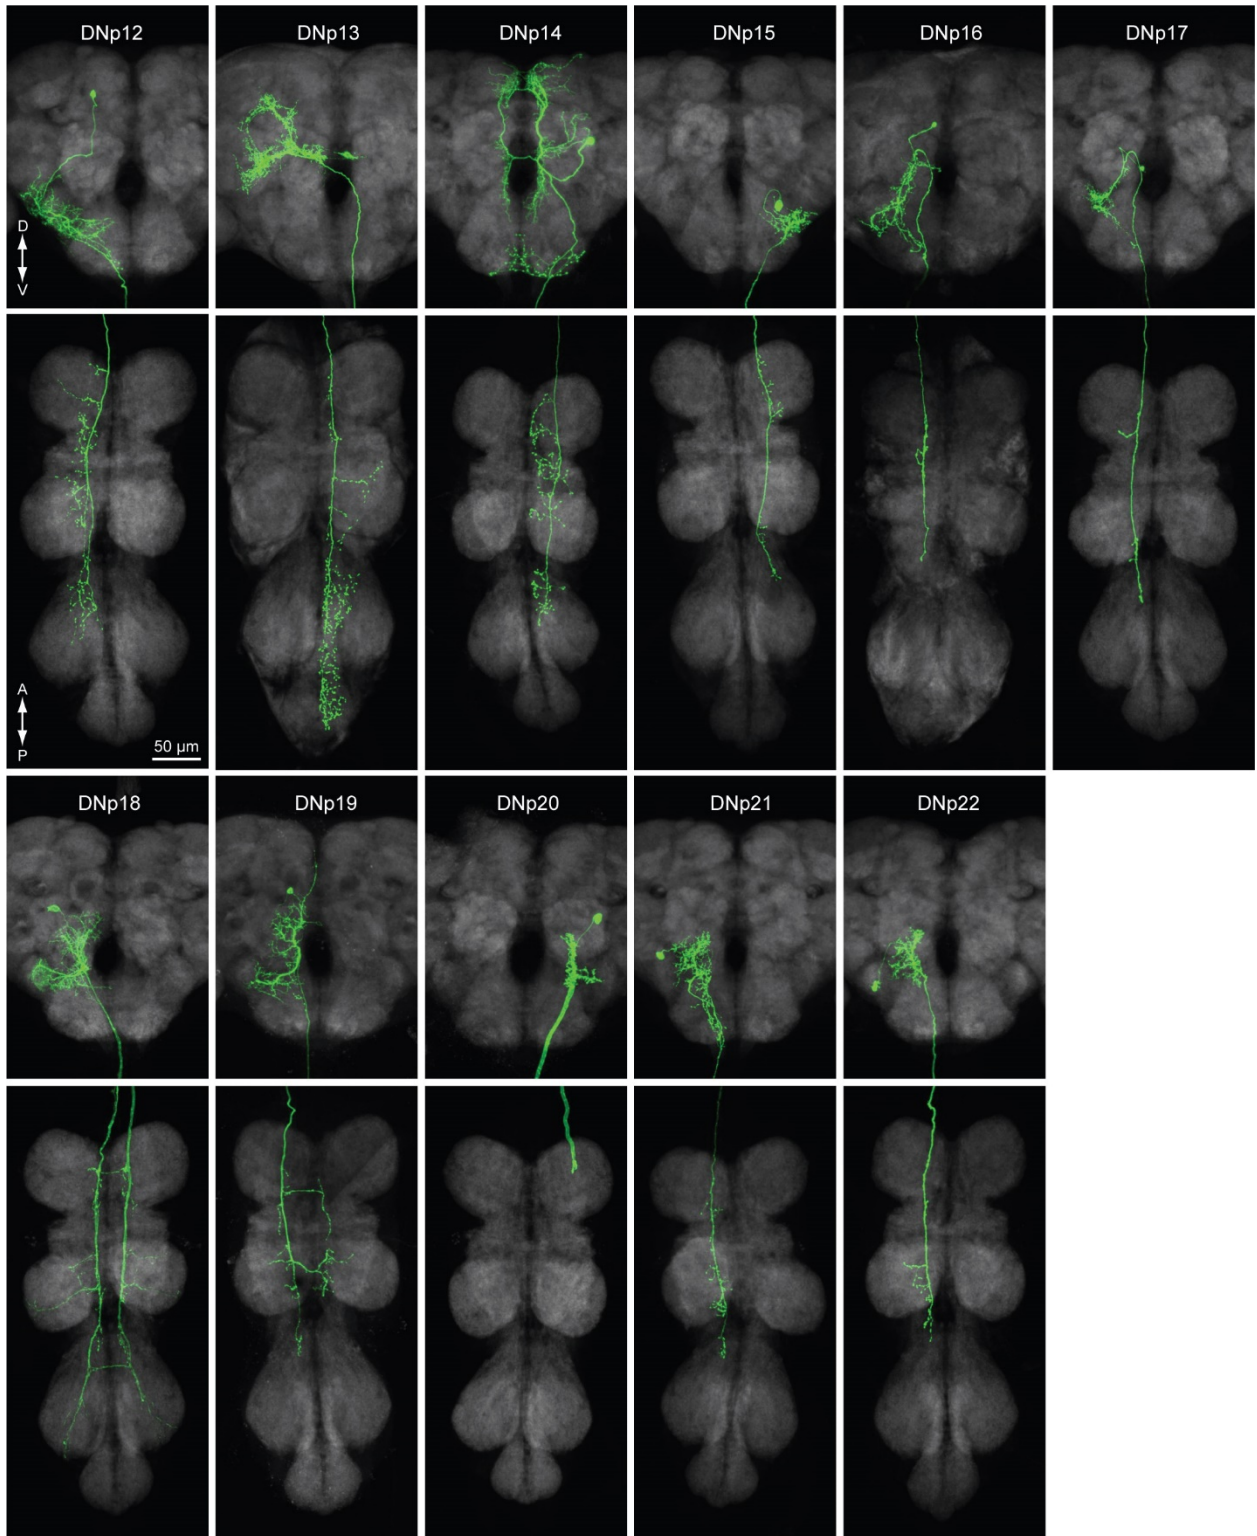

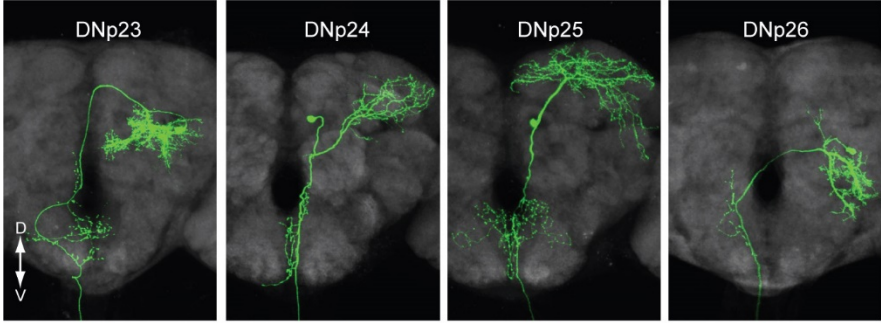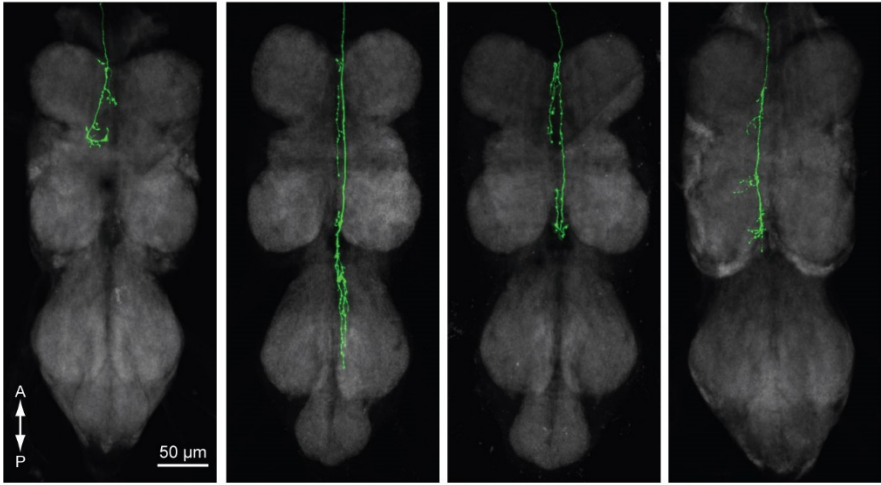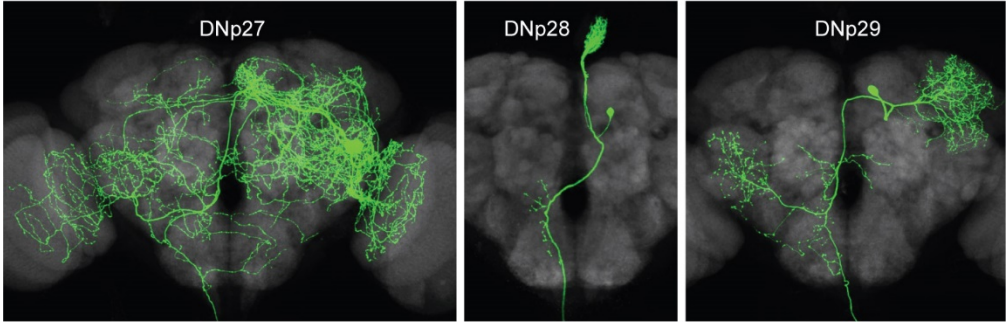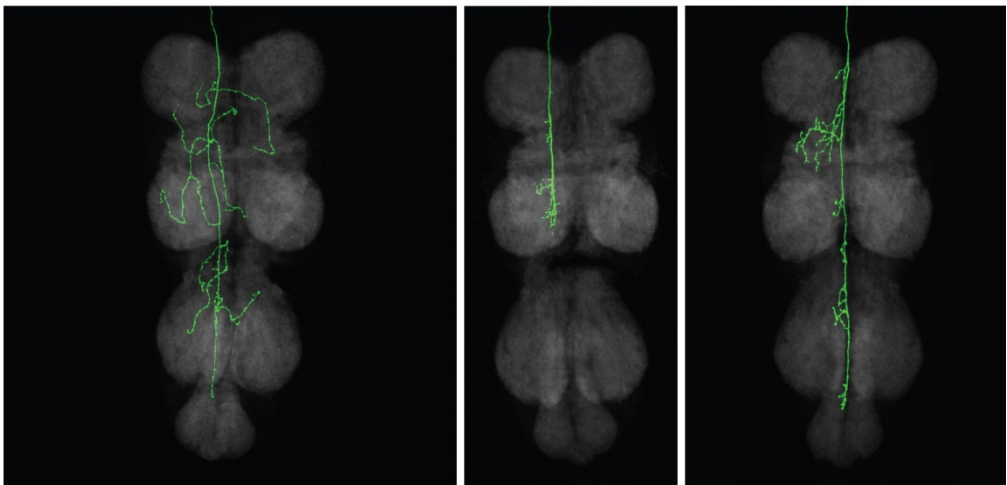



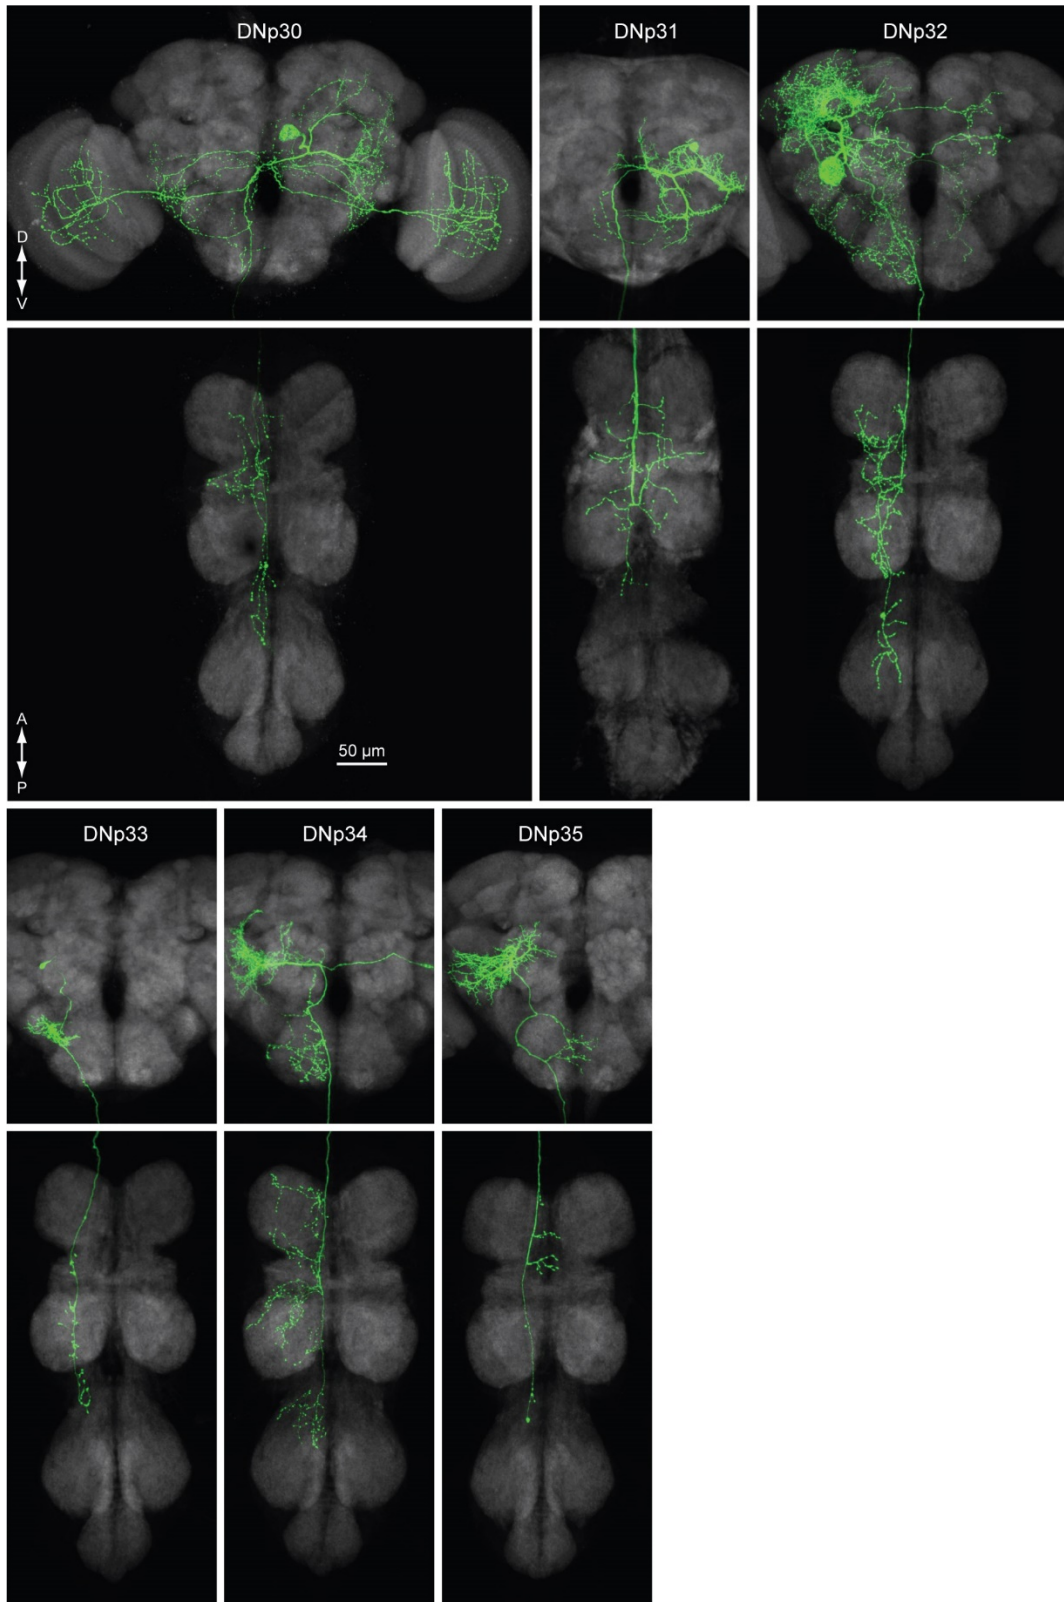

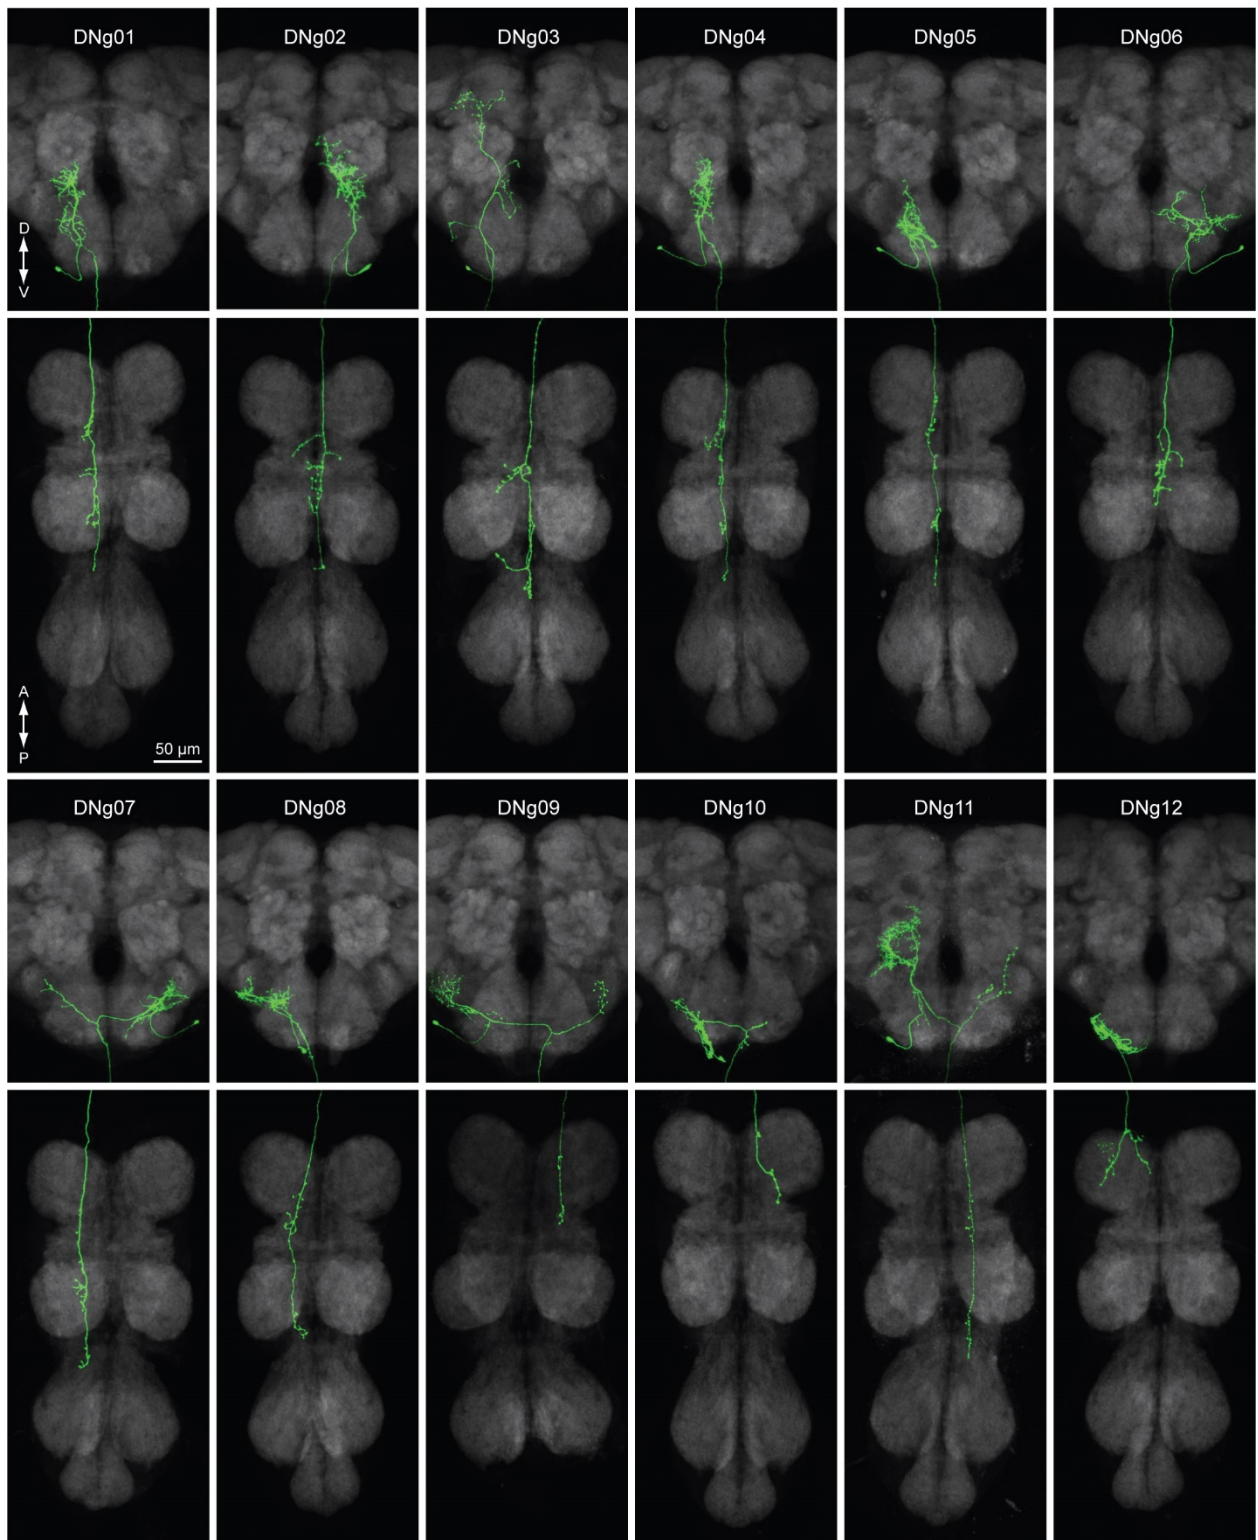

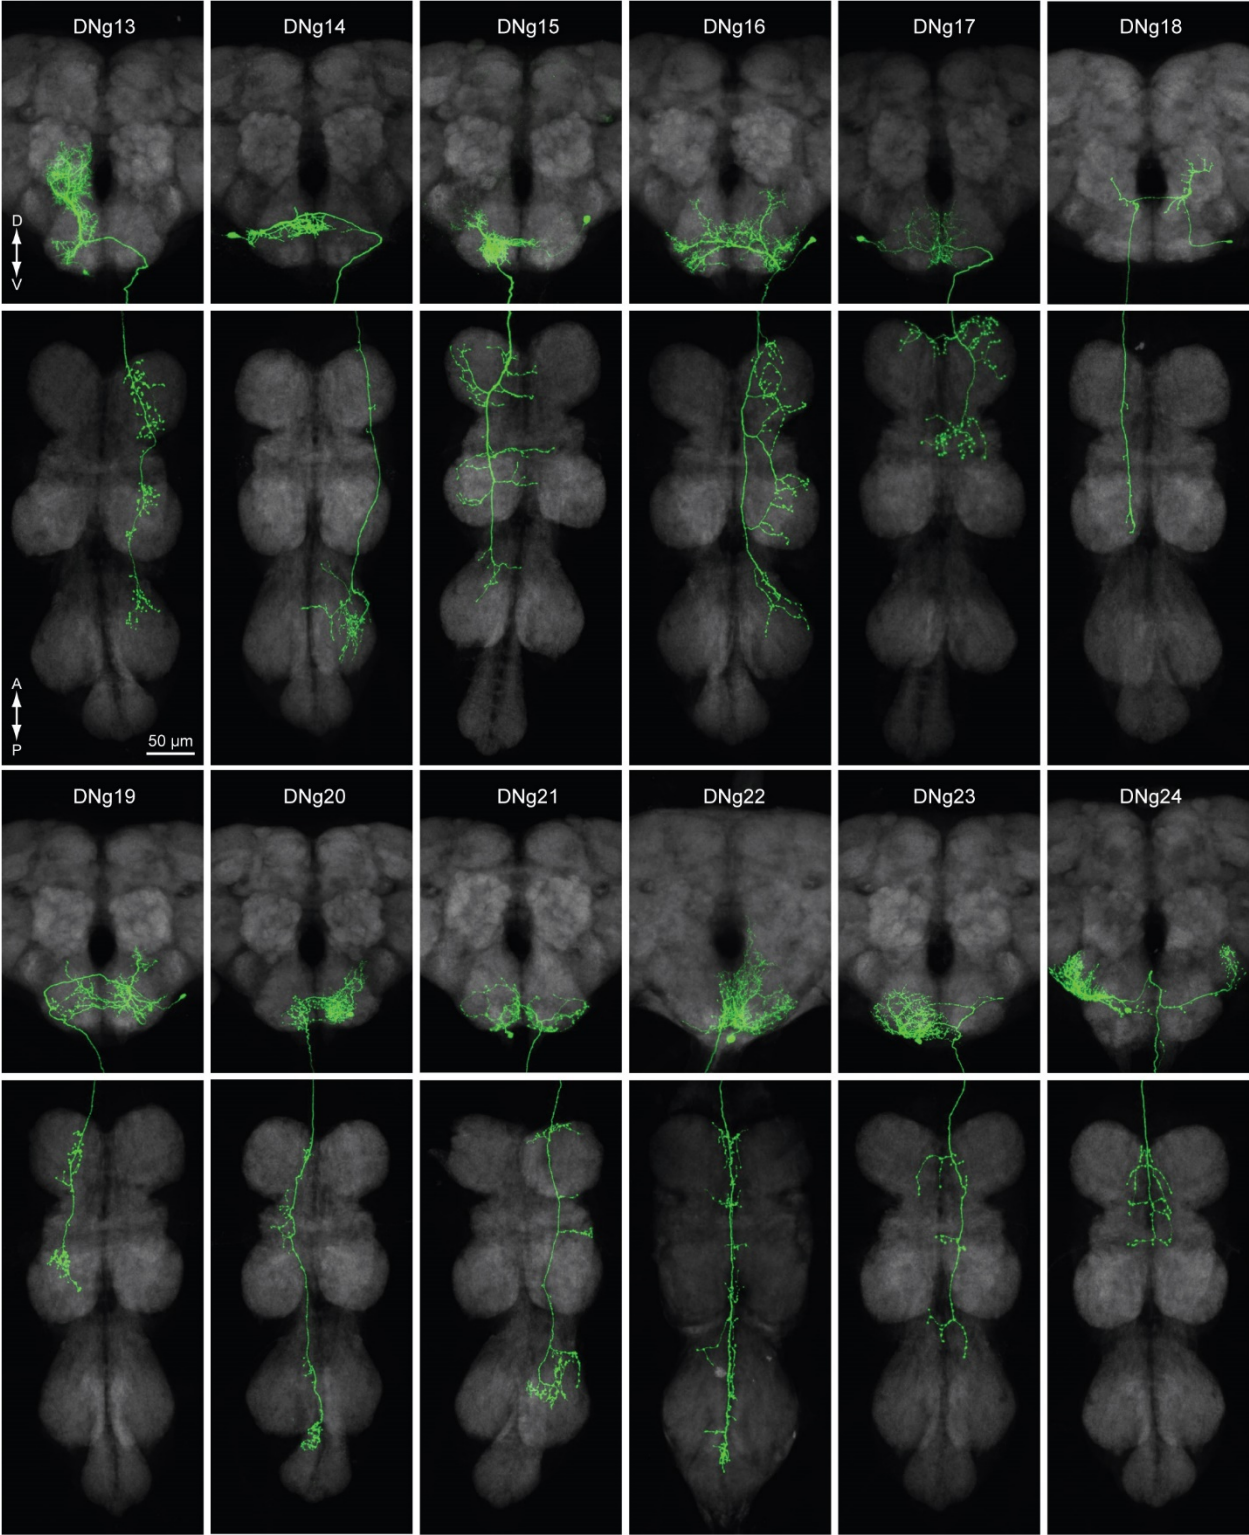



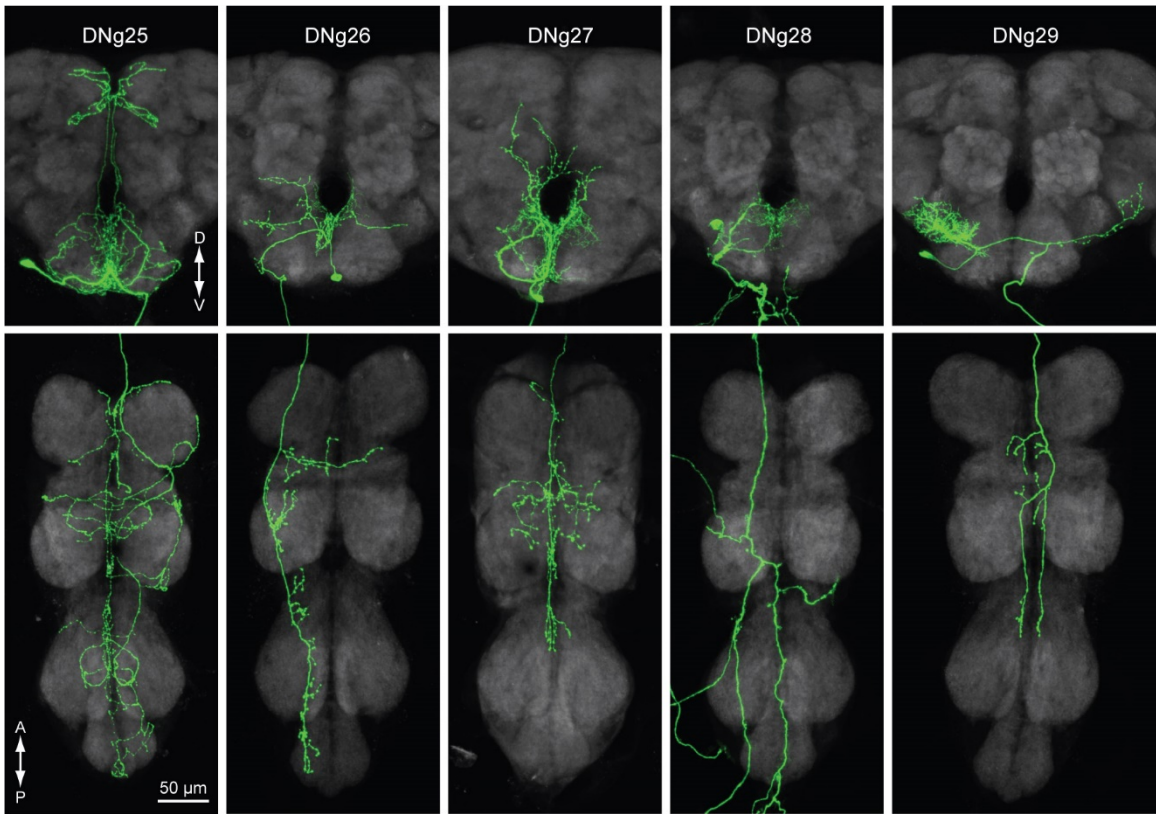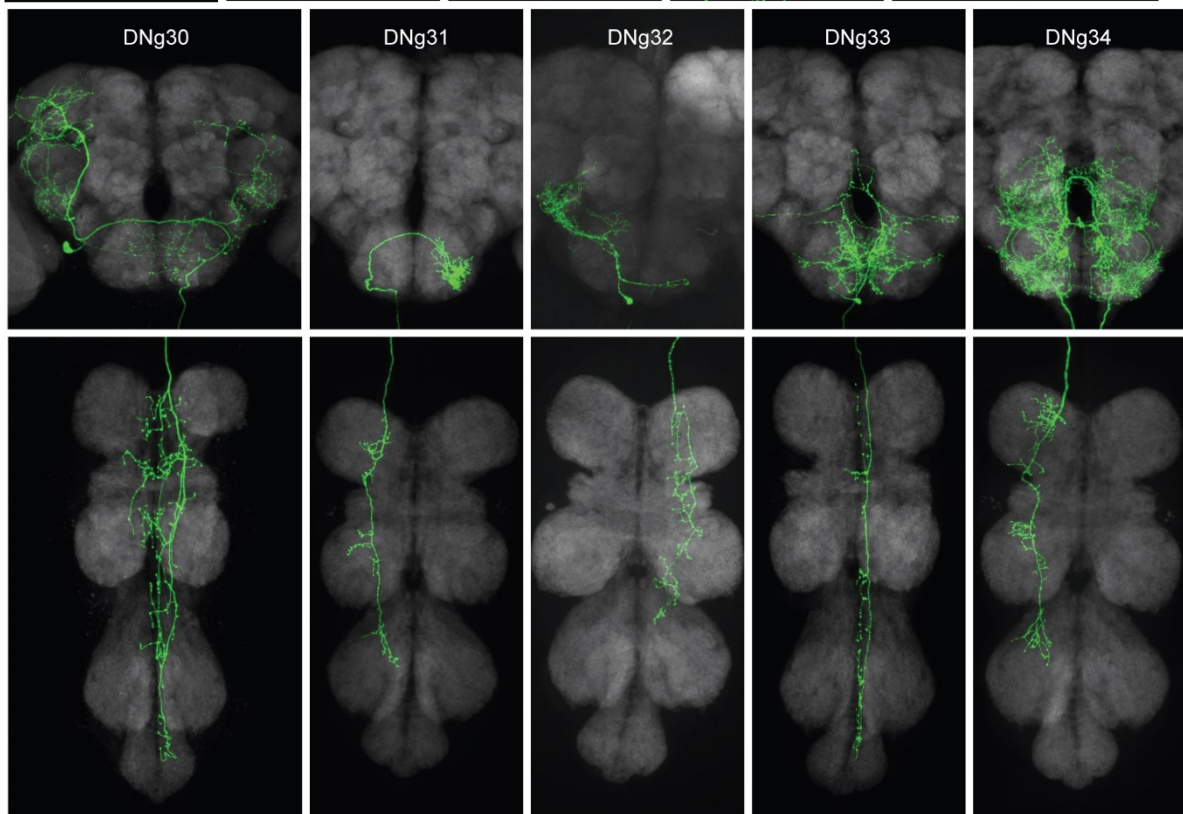

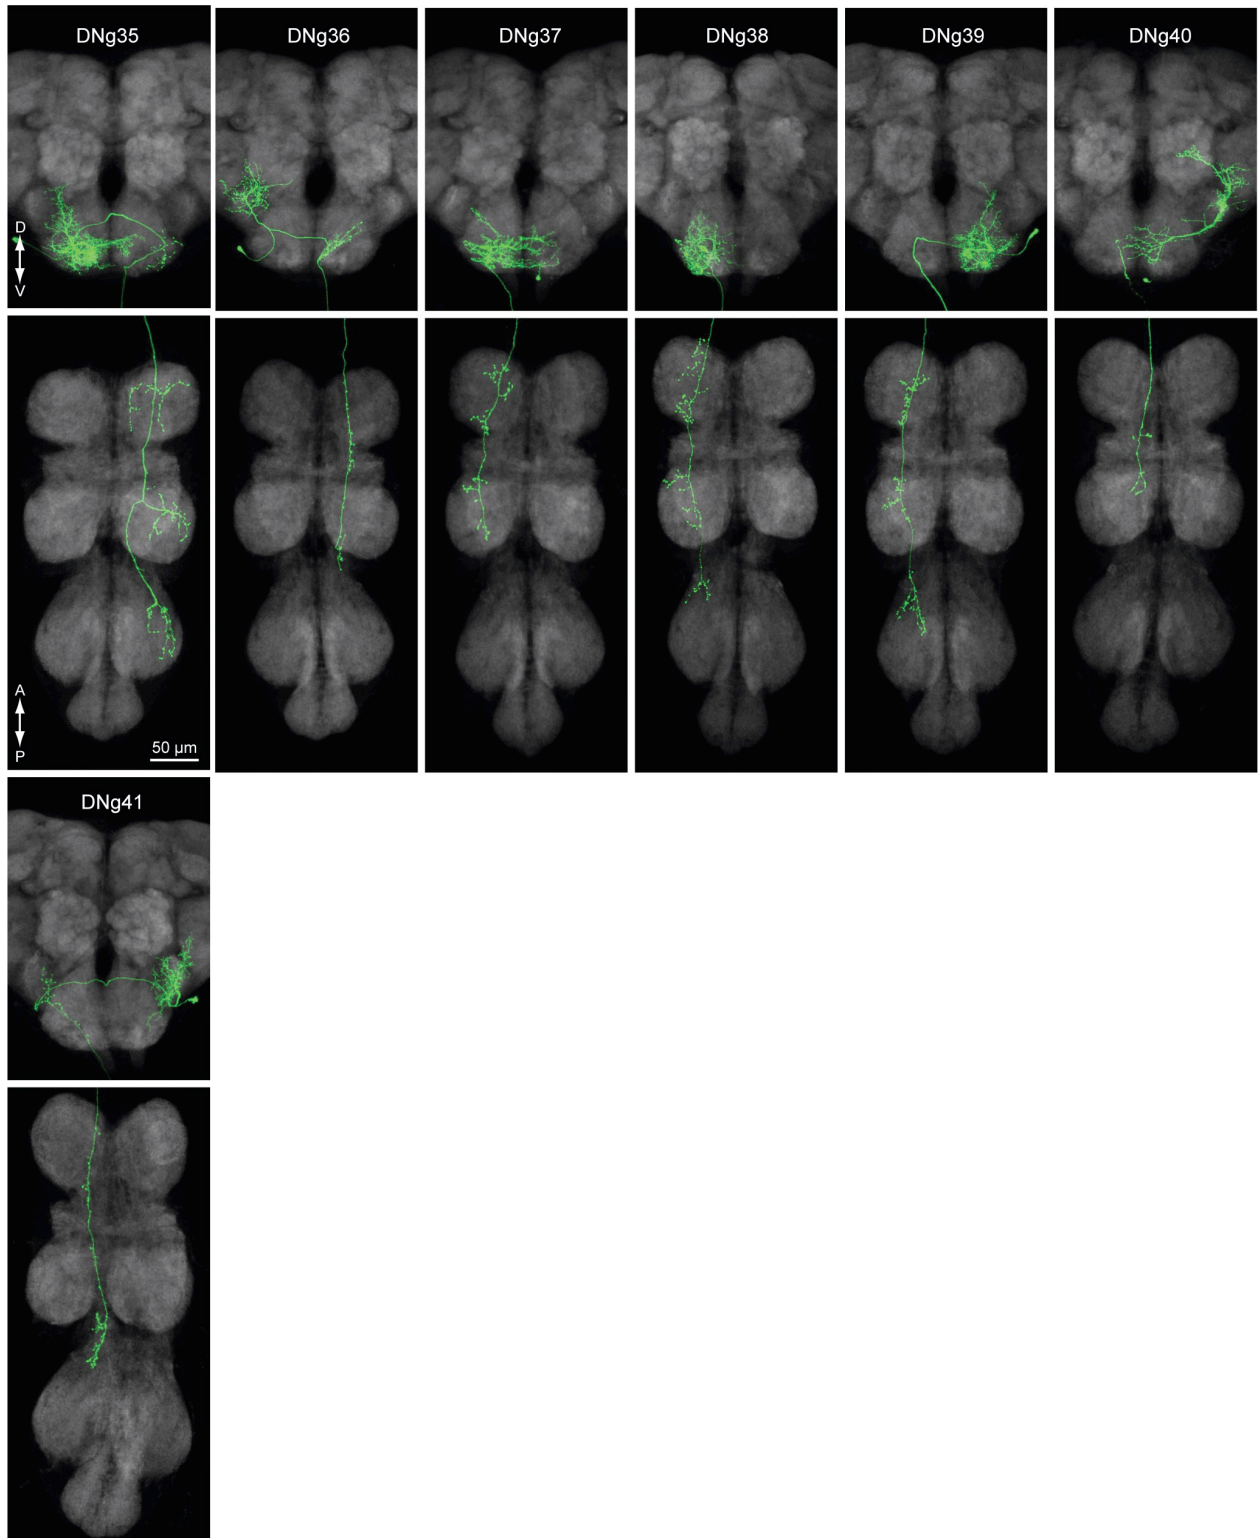

**Figure 2. figure supplement 3. Morphology of DNs (3/4).**

Morphology of identified DNs, group g, whose somata are located on the gnathal ganglion.



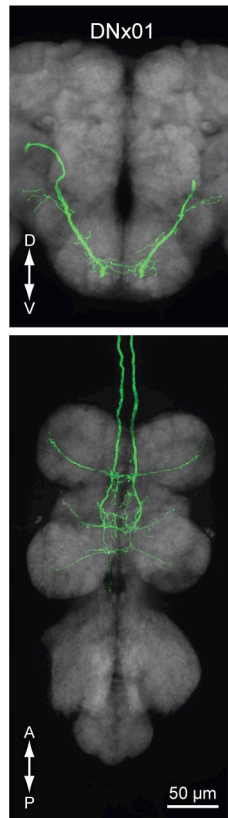

**Figure 2. figure supplement 4. Morphology of DNx (4/4).**

Morphology of identified DN, group x, whose soma is located outside the brain.

Figure 3—figure supplement 1

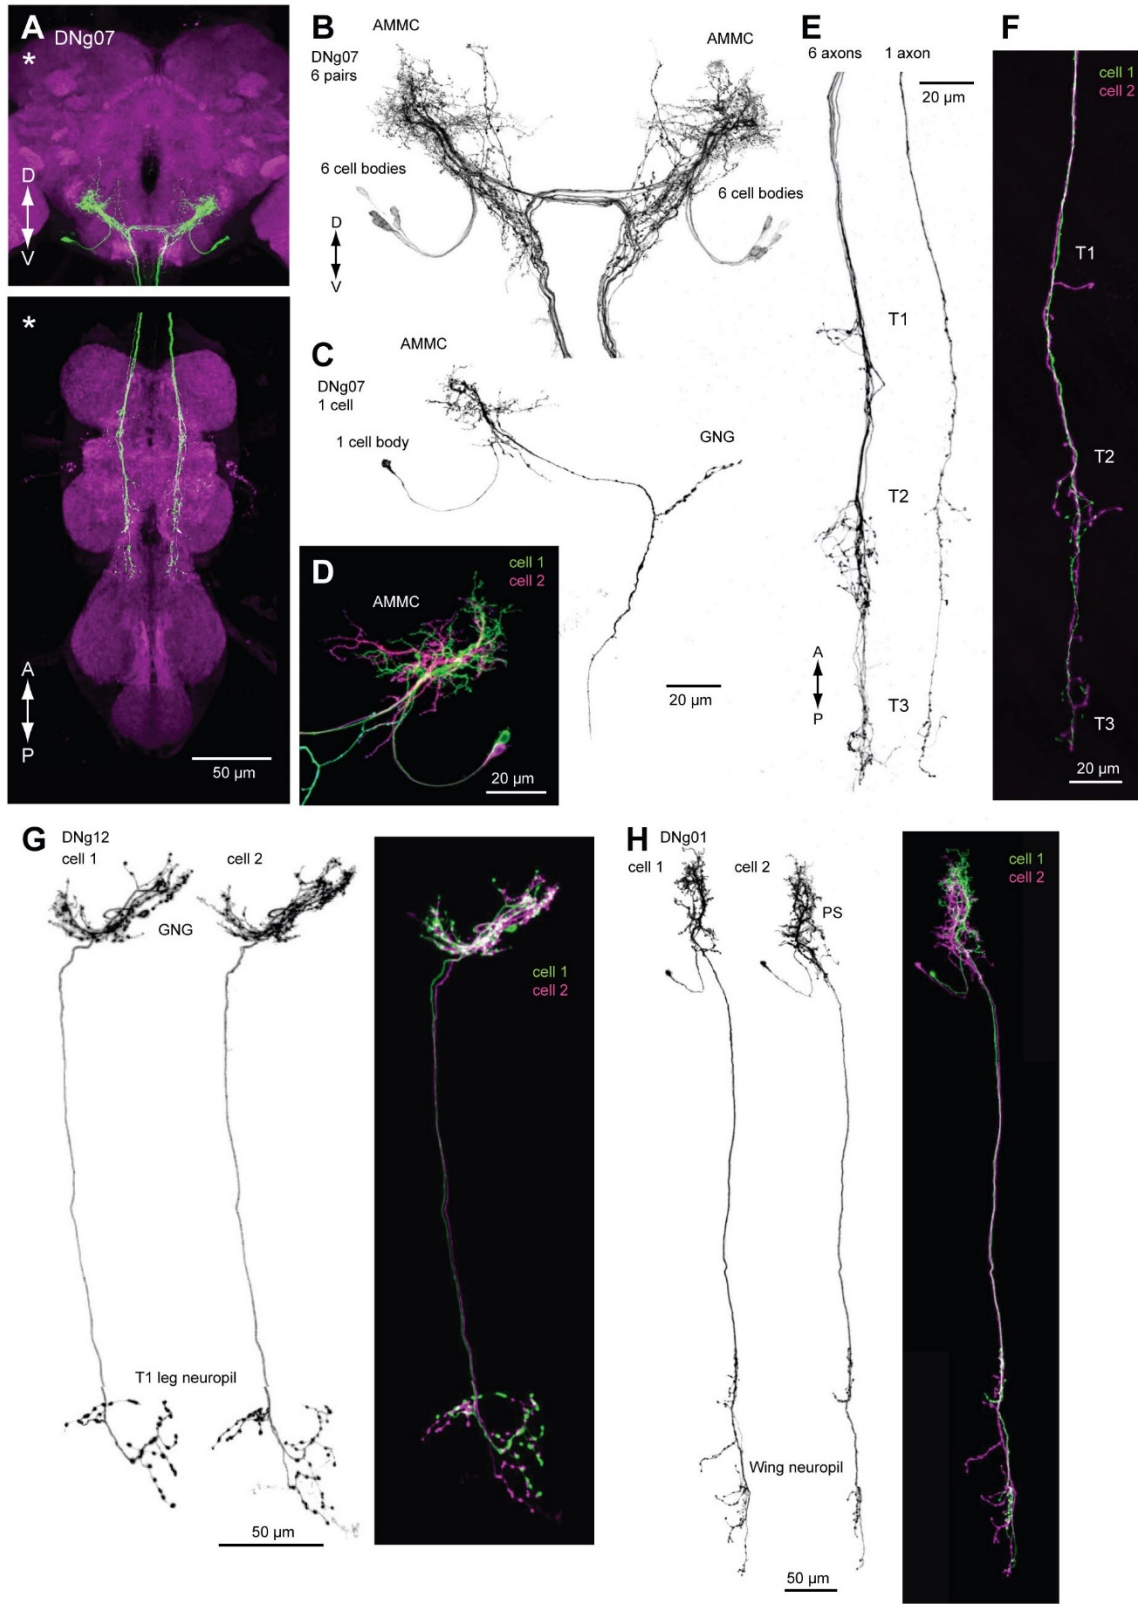

**Figure 3. figure supplement 1.**

(A) An example of the morphology of DN<sub>g</sub>07 population.

(B) Confocal image of brain innervation for the sample with 6 pairs of DN<sub>g</sub>07 type neurons.

(C) Confocal image of brain innervation for the sample with a single DN<sub>g</sub>07.

(D) Multicolor flip-out of the DN<sub>g</sub>07 population shows two different neurons in that type.

(E-F) The corresponding VNC projection images for samples with 6 or a single DN, as in B-D.

(G-H) Morphology of individual neurons in population DN types (G) DN<sub>g</sub>12 and (H) DN<sub>g</sub>01. Individual morphologies and merged image are shown.

Figure 4—figure supplement 1

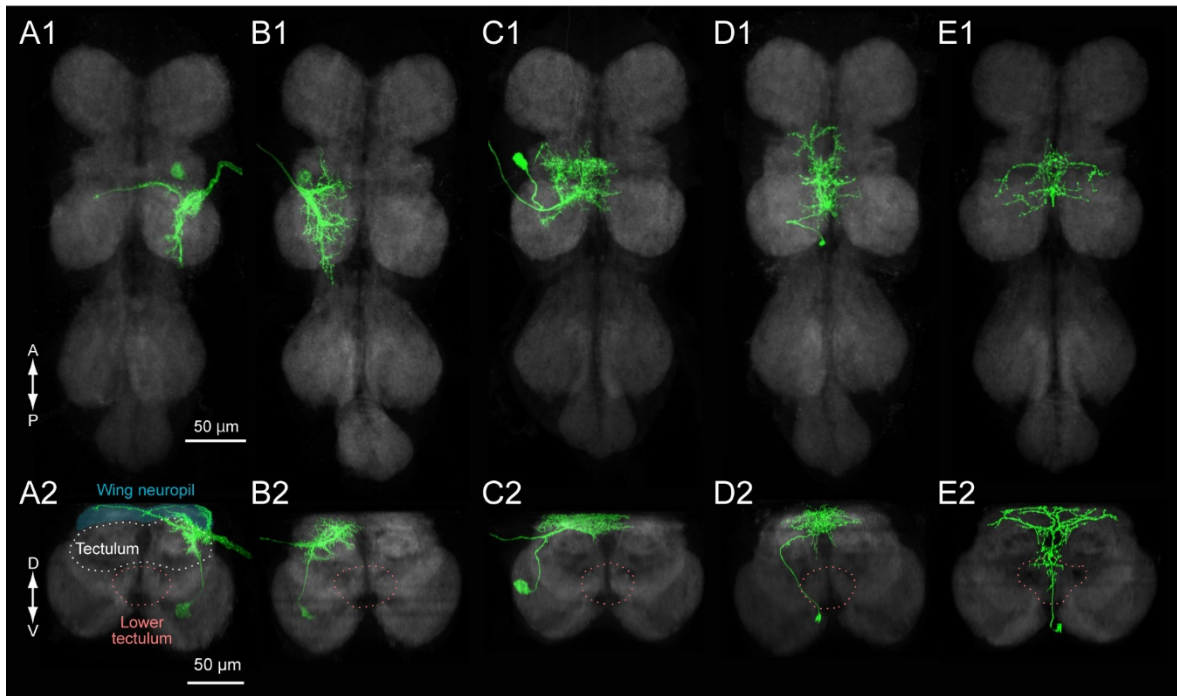

**Figure 4. figure supplement 1. Morphology of interneurons innervating the wing neuropil.**

(A-E) Isolated morphologies of wing muscle motor neurons for (A) steering muscle b1 (mn**b**1), (B) steering muscle b2 (putative), (C) a dorsoventral power muscle (DVM), as well as two wing neuropil local interneurons (D, E). The horizontal view of whole VNC (*top*) and the frontal view of T2 segment are shown (*bottom*). The area of the wing neuropil is shaded with light blue in A2. The areas of tectulum and lower tectulum are indicated with white (A2) and red (B2-E2) dotted lines, respectively. These example moto- and interneurons from the wing neuropil rarely innervate the lower tectulum.

Figure 4—figure supplement 2

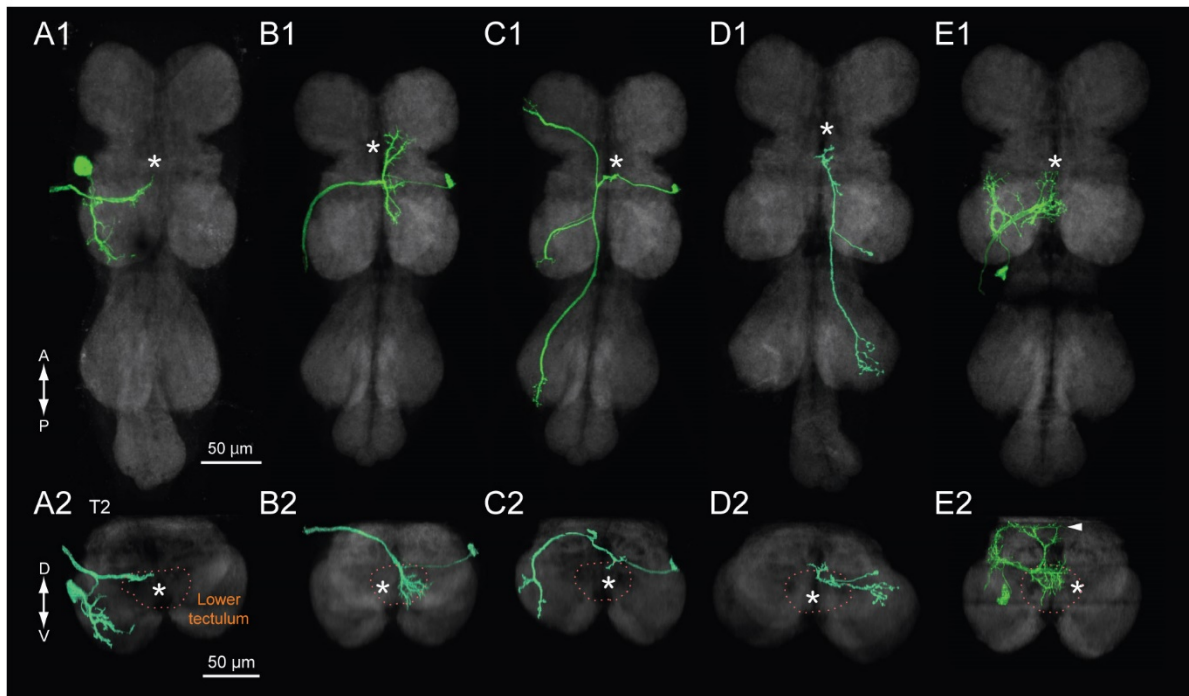

**Figure 4. figure supplement 2. Morphology of interneurons innervating the lower tectulum.**

(A-E) Isolated morphologies for motorneurons and interneurons innervating the lower tectulum, including two neurons postsynaptic to the giant fiber (the tergotrochanteral muscle motor neuron, TTMn (A) and the peripheral synapsing interneuron, PSI (B)), two intersegmental interneurons (C-D), and unknown motorneurons (E). Images as in Figure 4—figure supplement 1. The gross position of the lower tectulum is shown with an asterisk and orange dotted line. The smooth processes (inputs) of A-D are confined within the lower tectulum; E has smooth processes in wing neuropil and lower tectulum.



Figure 5—figure supplement 1

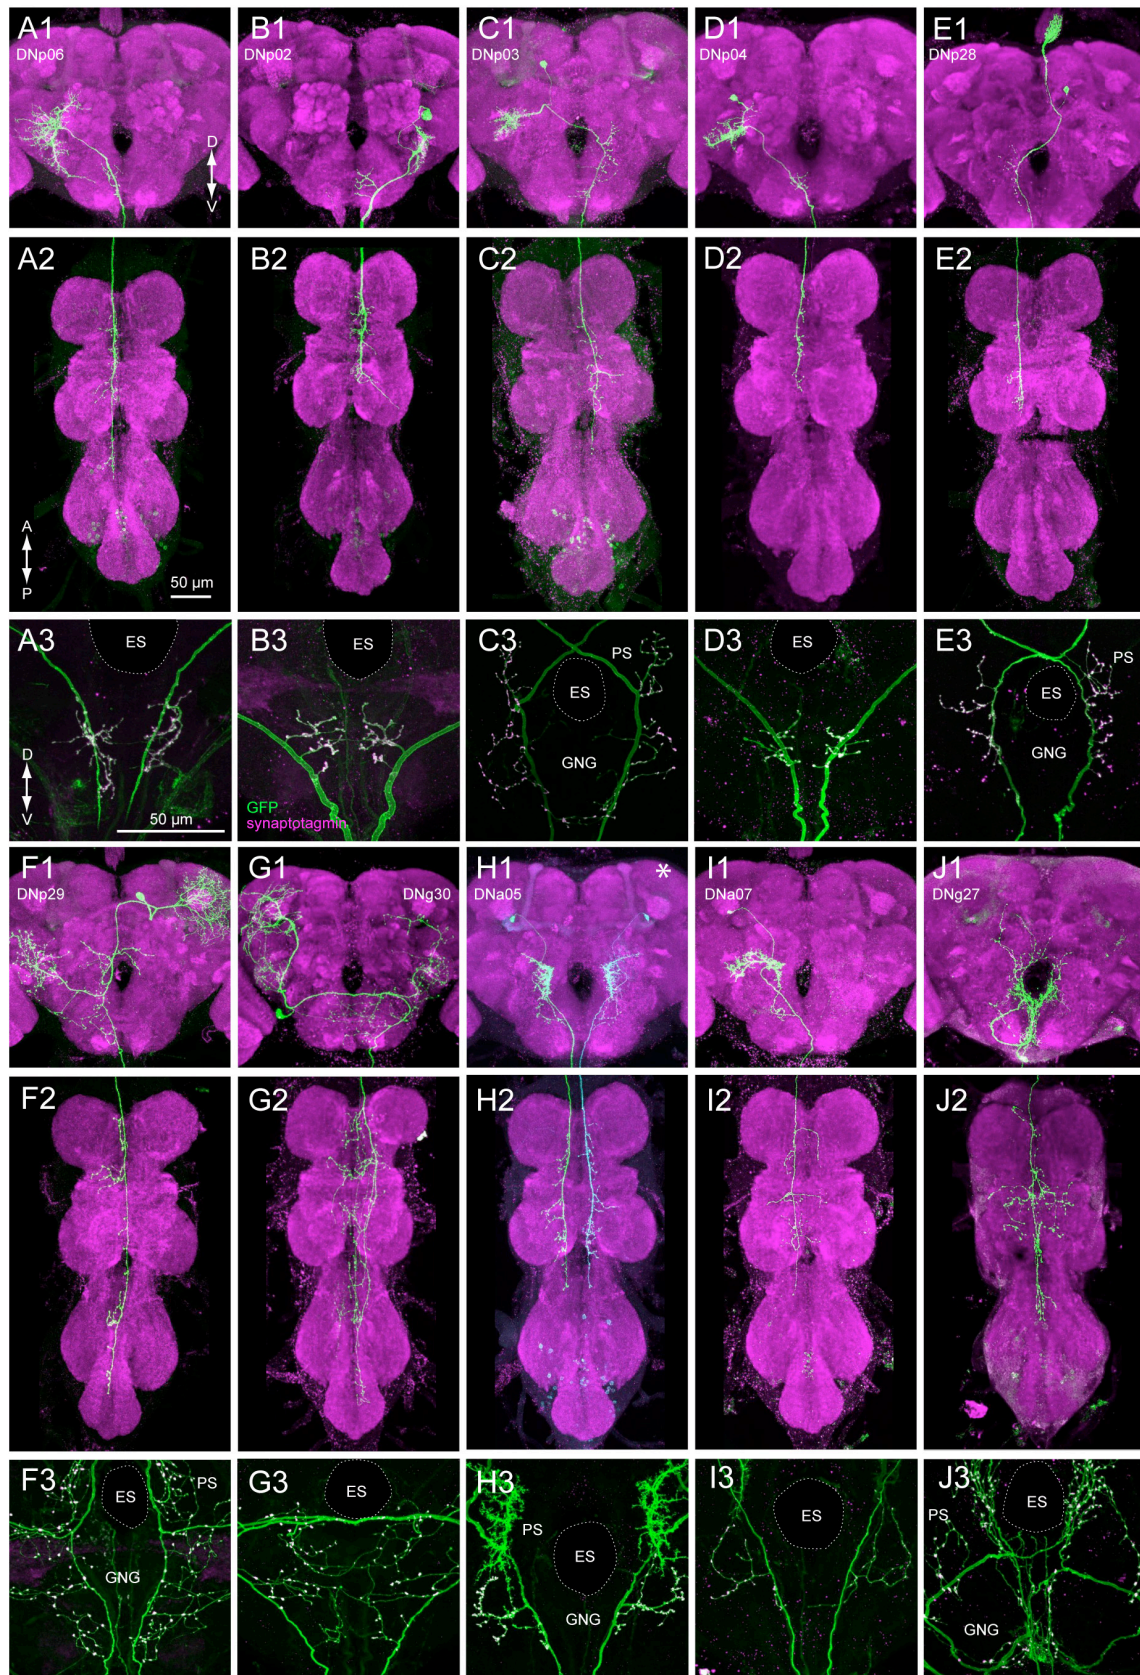

**Figure 5. figure supplement 1. DN presynaptic terminals in the gnathal ganglion.**

DN innervation in the brain (A1-J1) and VNC (A2-J2) obtained with the multicolor flip-out technique, and the corresponding result of synaptotagmin labeling in the GNG (A3-J3). Ten examples of DNs with varicose process in the GNG are shown.



Figure 5—figure supplement 2

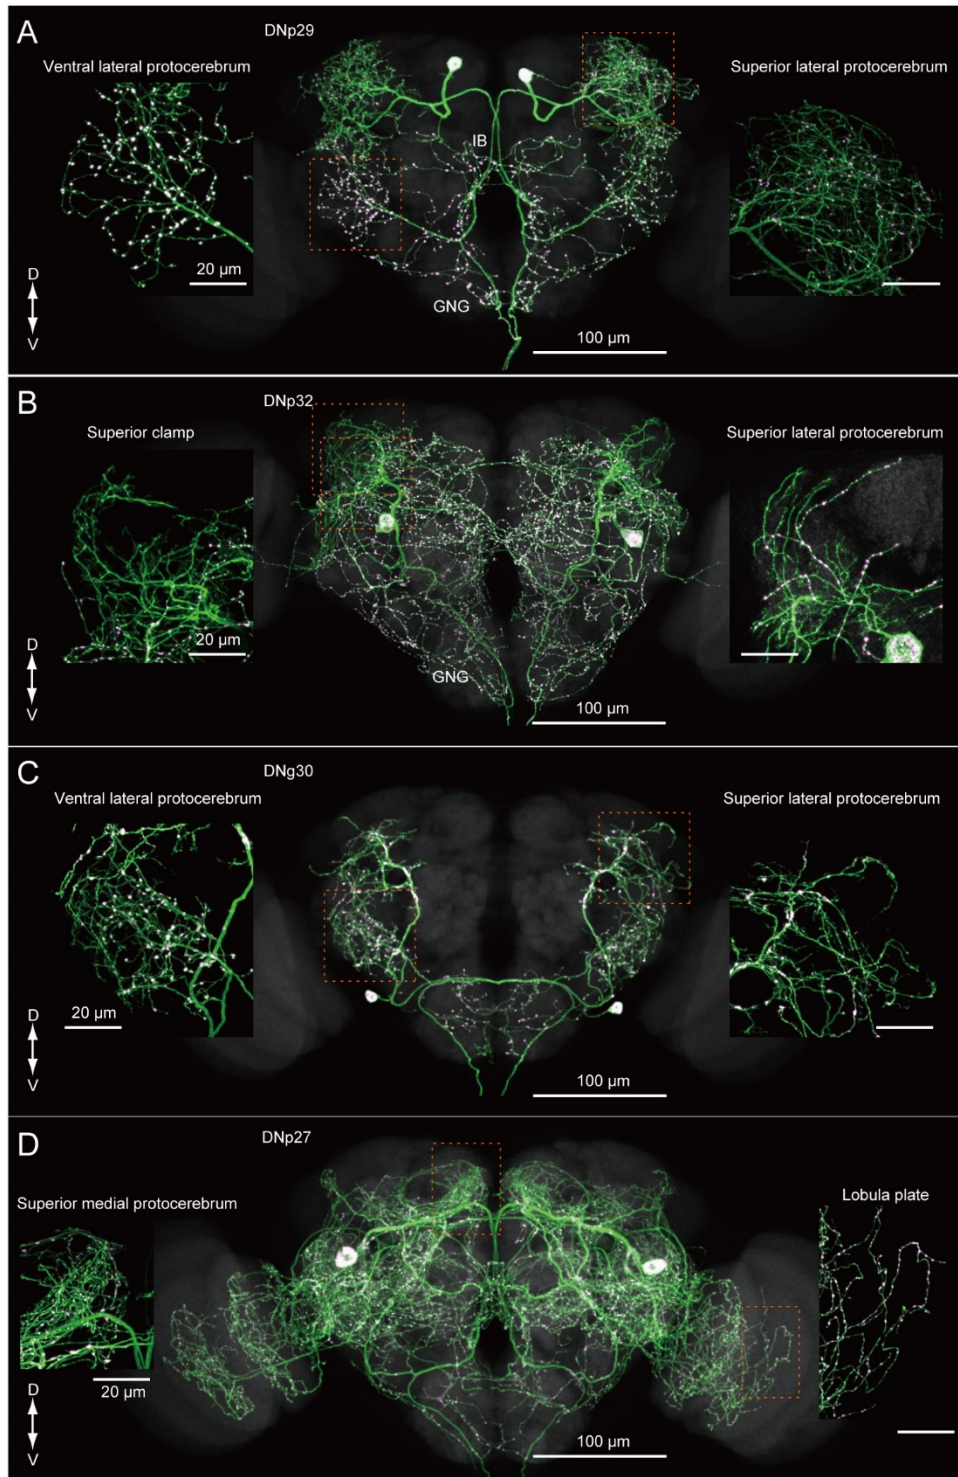

**Figure 5. figure supplement 2. DN presynaptic terminals in the brain.**

The result of synaptotagmin labeling of split-GAL4 lines targeting four DN types with prominent varicose endings in the brain. Insets show magnification of regions indicated by orange dotted lines.

**(A)** Morphology of DNp29. A neuron with similar morphology has been described in *Drosophila* (SP1; Nässel, 1993, Figure 4). The DN has both smooth and varicose processes in the superior lateral protocerebrum. Varicose processes are dominant in other regions.

**(B)** Morphology of DNp32. A neuron with similar morphology in the brain has been described in *Drosophila* (DN1, Tanaka et al., 2012, Figure 8). The DN has smooth process in the superior and inferior clamp, superior lateral protocerebrum and posterior lateral protocerebrum. Varicose processes are dominant in other regions.

**(C)** Morphology of DNg30. Both smooth and varicose process are observed in the superior lateral protocerebrum and anterior ventral lateral protocerebrum. Varicose processes are dominant in other regions. The morphologies in the brain and VNC are similar to those of the natalisin-positive neurons, called inferior contralateral interneurons (Jiang et al., 2013, Figure 2)

**(D)** Morphology of DNp27. Smooth processes are only observed in the superior medial protocerebrum. The morphology is partially similar to a known DN (GAMDN, Mu et al., 2014), but DNp27 lacks the innervation to the antennal mechanosensory motor center.

Figure 5—figure supplement 3

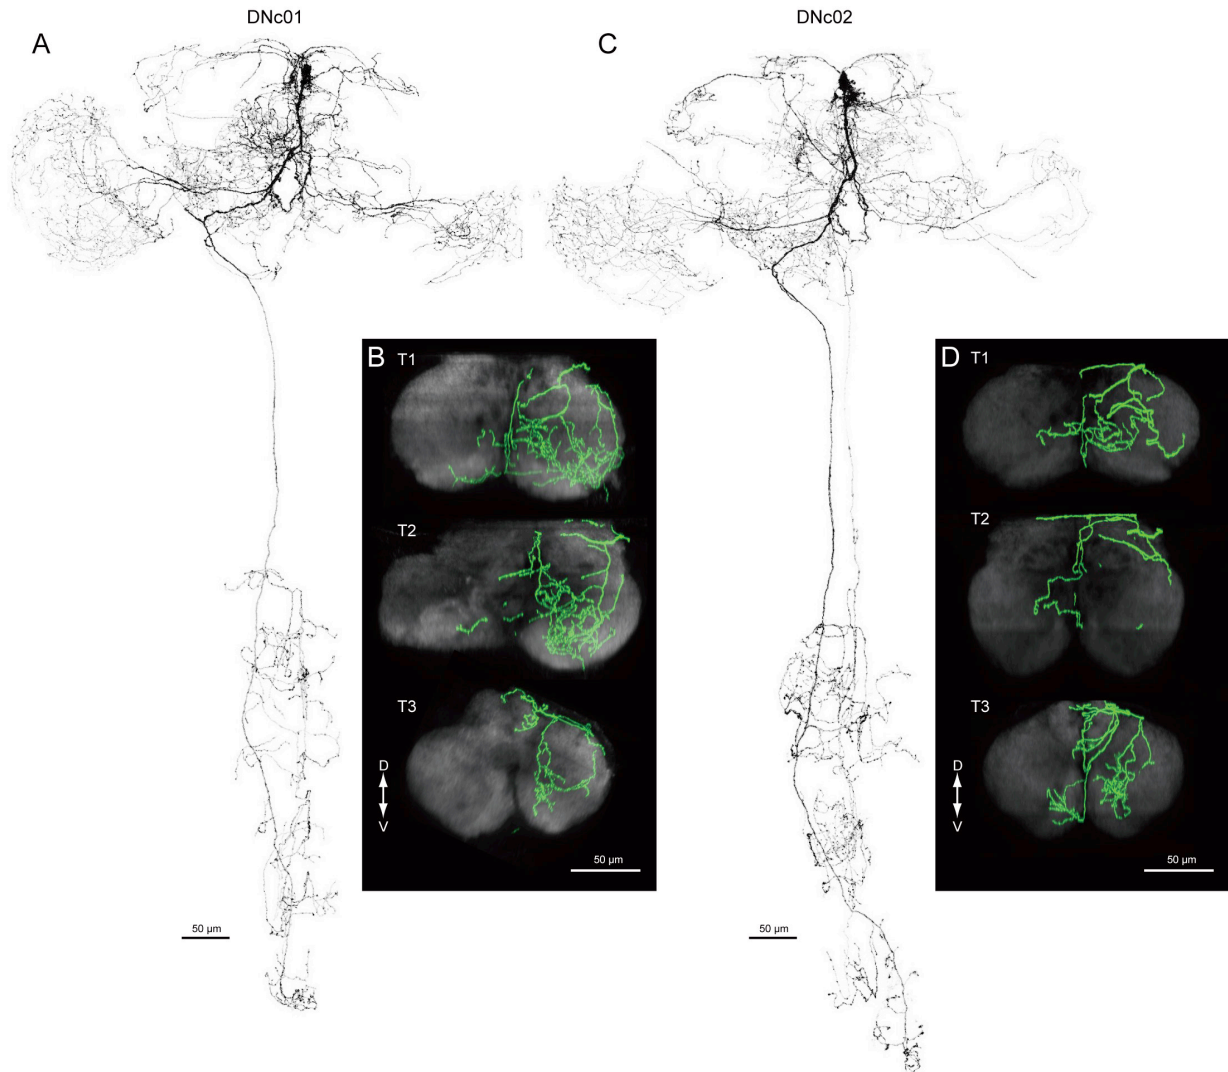

**Figure 5. figure supplement 3. DNs in the pars intercerebralis.**

**(A-D)** Morphology of DNc01 and c02. Whole morphology (A, C) and horizontal views of VNC (B, D) are shown. Both cell types have their cell body located in the pars intercerebralis, where Hsu and Bhandawat (2016) also observed DNs. c01, but not c02, has a varicose process in the mushroom body lobe, and both have varicose processes in the fan-shaped body, protocerebral bridge, and the mushroom body calyx. c02, but not c01, has a varicose process in the lobula. Both c01 and c02 project to leg neuropils as well as dorsal neuropils and the medial ventral association center. However, c02 projects to the dorsal part of the leg neuropils, where c01 has no innervation.



Figure 5—figure supplement 4

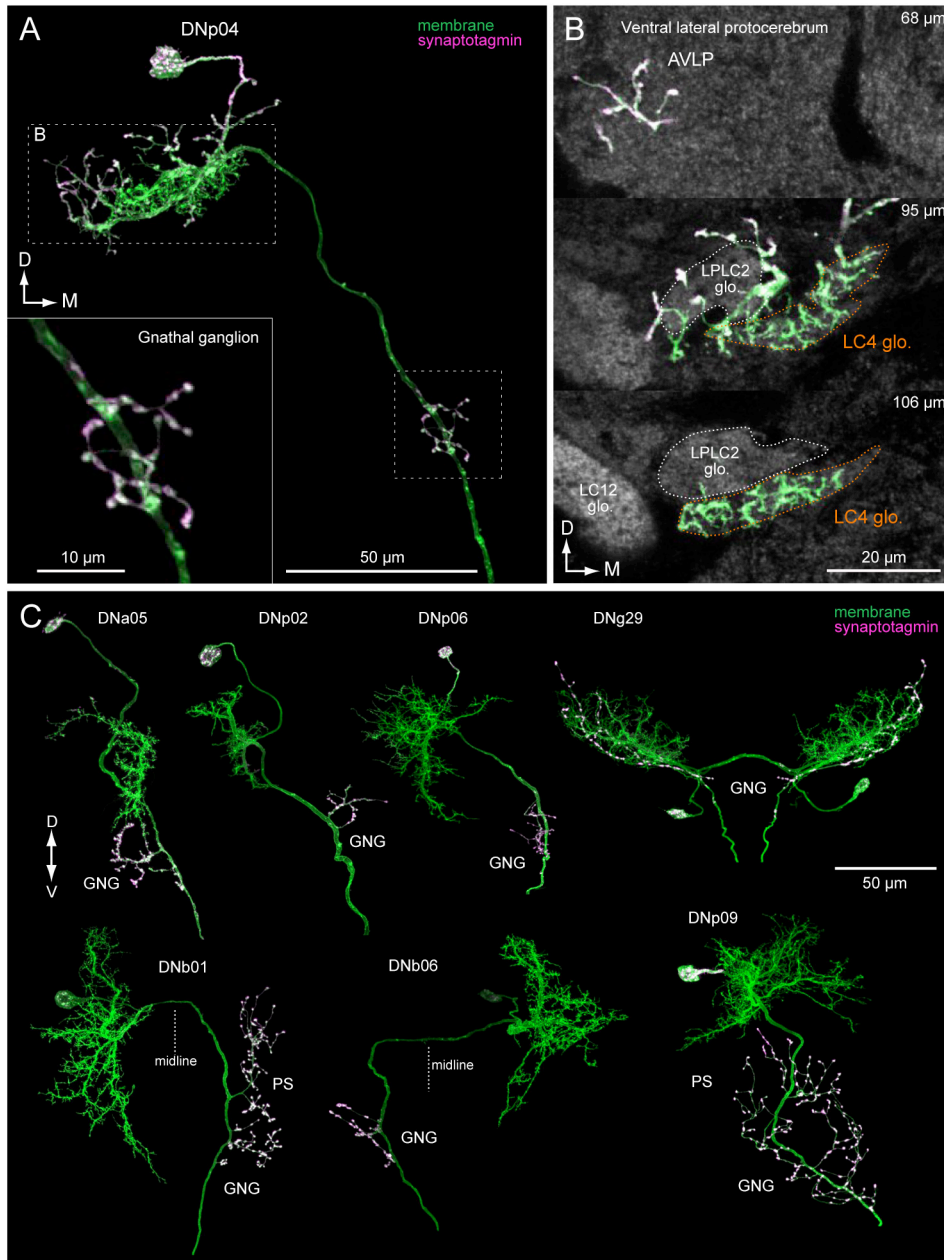

**Figure 5. figure supplement 4. DN presynaptic terminals in the brain.**

(A) Synaptotagmin labeling of DNp04 (green, membrane-bound GFP; magenta, synaptotagmin), shown as a maximum intensity projection of the whole morphology in the brain. Inset shows magnification of innervation in the GNG. (B) Innervation of p04 in the ventral lateral protocerebrum near the optic glomeruli. Three consecutive confocal stacks are shown with depth from the anterior brain surface indicated in *top-right*. p04 innervates the LC4 glomerulus with smooth processes and has presynaptic branches outside the glomerulus (C) Examples of synaptotagmin labeling in the brain for DNa05, p02, p05, g29 (both DNs in pair shown), b01, b06, and p09.

Figure 6—figure supplement 1

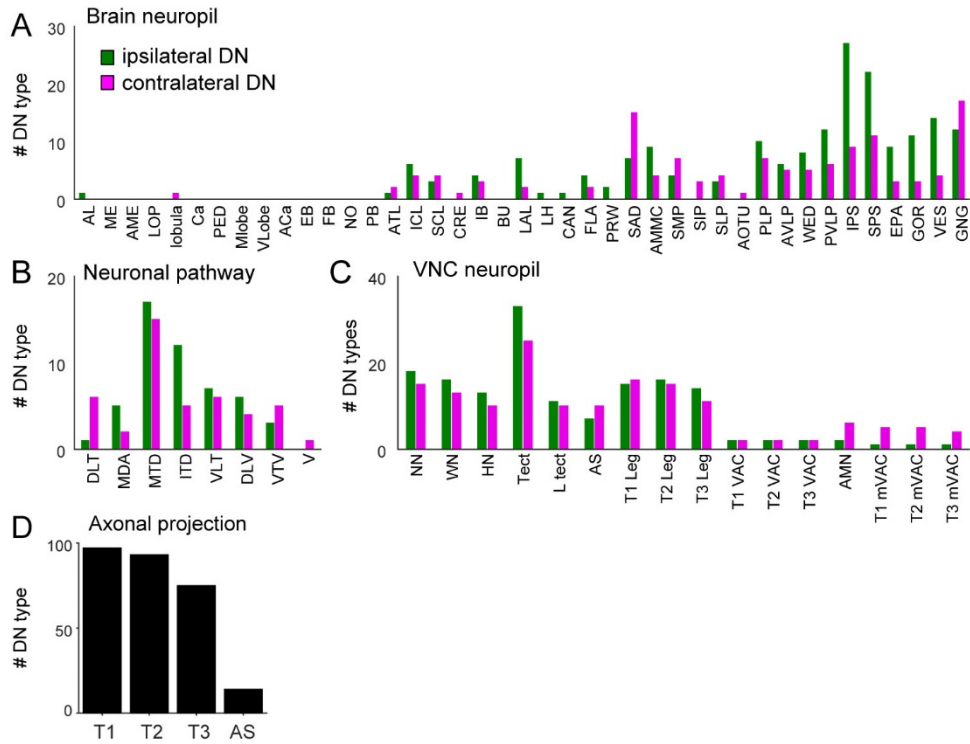

**Figure 6. figure supplement 1. Laterality and extent of DN axonal projections.**

(A-C) The number of DN types innervating individual brain regions (A), tracts (B), and VNC regions (C) divided into ipsilateral- (green) and contralateral- (magenta) projecting DN.

(D) The number of DN types innervating each of the four different VNC segments. The majority of DN terminated in the T3 segment. DN reaching the abdominal segment (AS) were rare.

Figure 7—figure supplement 1

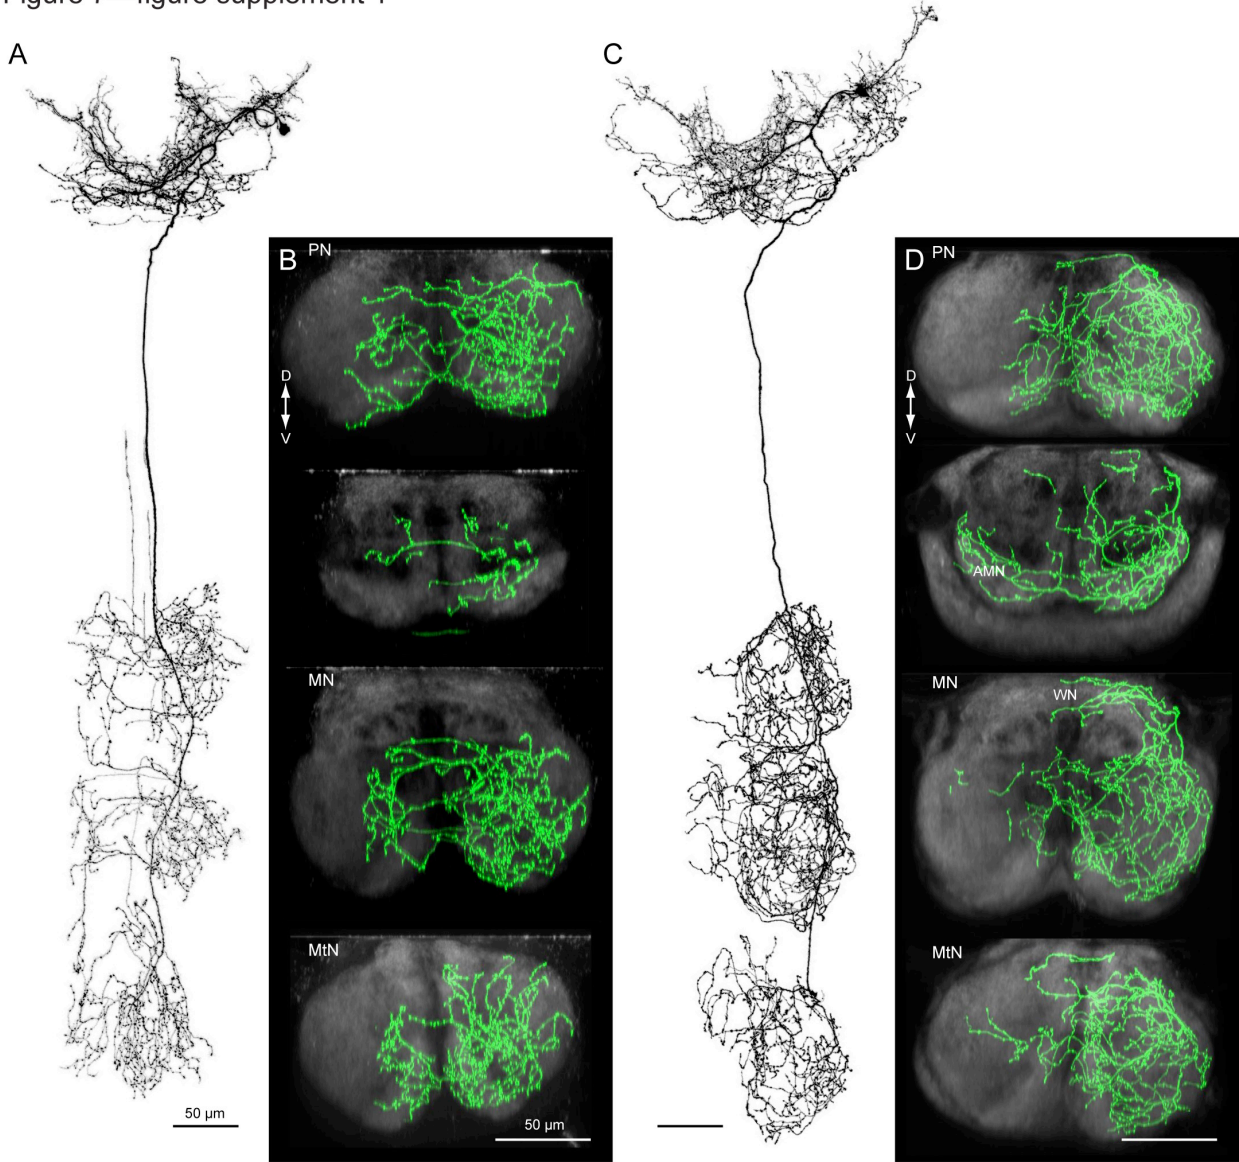

**Figure 7. figure supplement 1. Putative octopaminergic DNs.**

**(A-B)** Morphology of DNd02. Whole cell morphology (A) and frontal sections of VNC are shown (B).

The cell body is located in the GNG and the axon descends ipsilaterally through tract DLV. d02 has smooth process in the GNG, wedge, vest, anterior ventral lateral protocerebrum and posterior ventral lateral protocerebrum, and varicose process in the wedge and GNG. d02 has dense innervation to the leg neuropils including the ventral association center (VAC), but avoids the dorsal part of the VNC, including neck motor, wing and haltere neuropils. A few processes project within the medial ventral association center. Axonal projections to the VNC return back into the posterior neck connective. The morphology is similar to an octopaminergic DN, termed the OA-VL1 (Busch et al., 2009).

**(C-D)** Morphology of DNd03. Whole cell morphology (C) and frontal sections of VNC are shown (D).

The cell body is located the GNG and the axon descends ipsilaterally through tract DLT. The DN has smooth process in the GNG, wedge, vest, anterior ventral lateral protocerebrum, posterior ventral lateral protocerebrum, saddle, flange, posterior lateral protocerebrum, and varicose process in the wedge and GNG. The morphology is similar to an octopaminergic DN, termed the OA-VL2 (Busch et al., 2009).



Figure 7—figure supplement 2

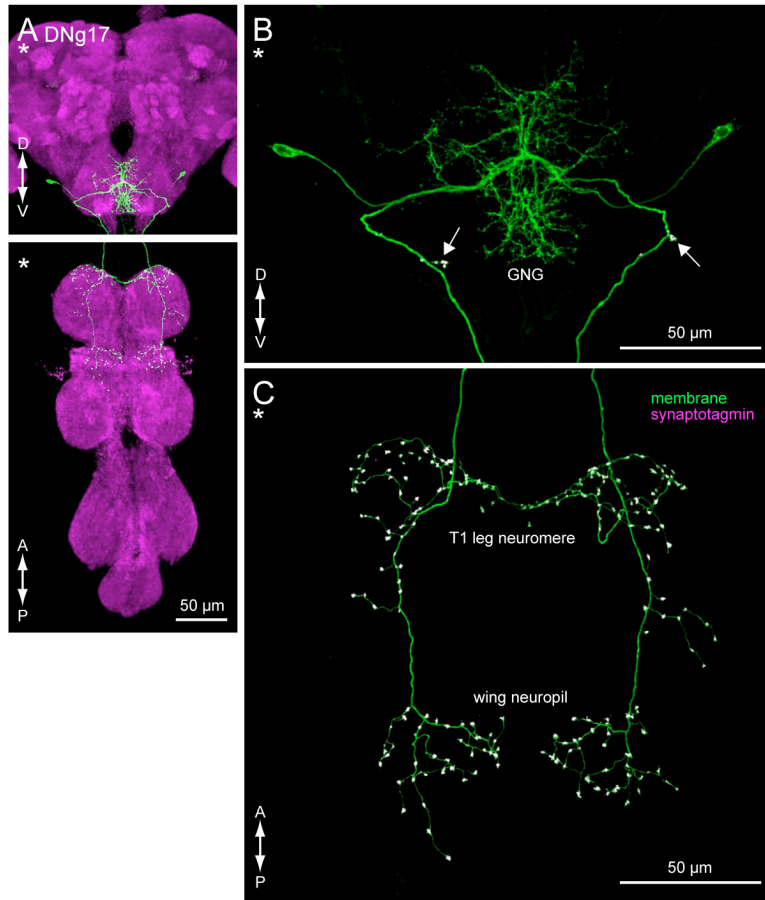

**Figure 7. figure supplement 2. DN projecting to both wing and leg neuropil.**

(A) DNg17 has smooth process in the saddle and GNG, and varicose process in the GNG. The DN descends contralaterally in the neck connective and projects to both leg and wing neuropils.

(B,C) Labeling of DNg17 with membrane (green) and presynaptic (magenta) markers in the brain (B) and VNC (C). The DN has a few process in the GNG, which show a positive signal for the presynaptic marker, and dense projections in the dorsal part of the prothoracic leg neuropil, and wing neuropil on the ipsilateral side.

Figure 7—figure supplement 3

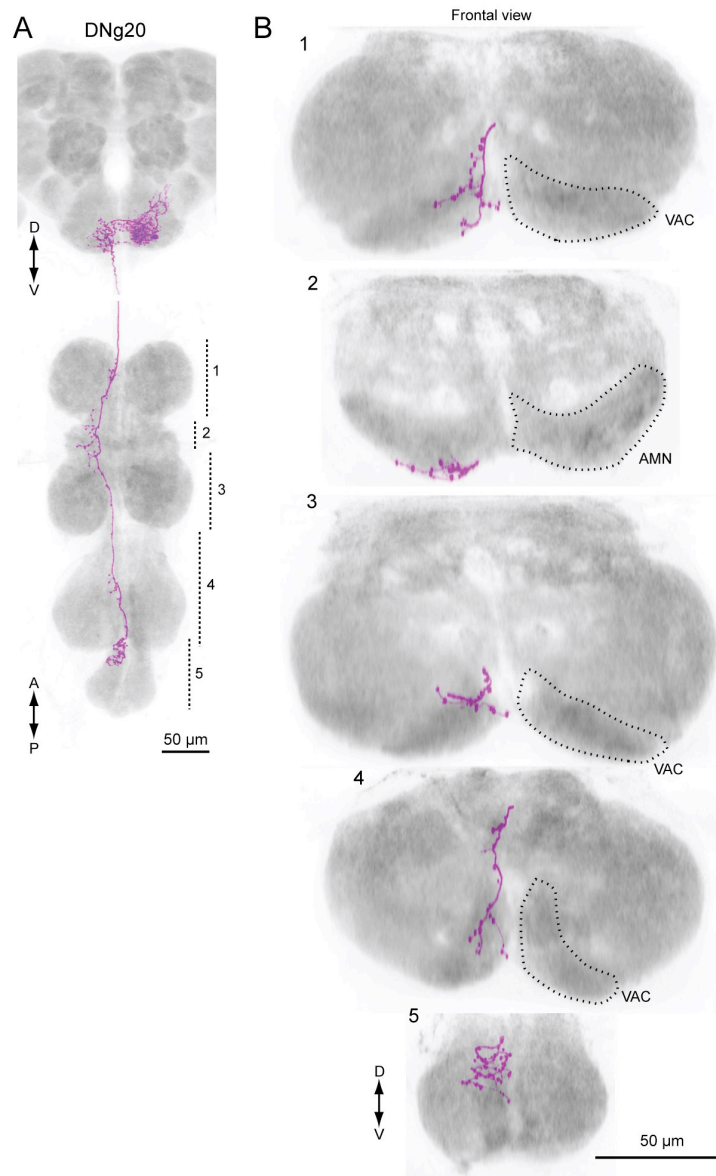

**Figure 7. figure supplement 3. DN projecting to the ventral association center.**

**(A)** Morphology of DNg20. The DN has smooth processes in the saddle and GNG, and smooth and varicose process in the GNG. The cell body is located on the GNG and the DN descends the contralateral neck connective.

**(B)** Frontal view of DNg20 innervation in the VNC. The number in the *top left* of each image corresponds to the number shown in the VNC in panel (A). The innervation is localized in the ventral most area of the VNC, which corresponds to the sensory area. The DN also projects to the accessory mesothoracic neuromere (AMN) (B2).

Figure 7—figure supplement 4

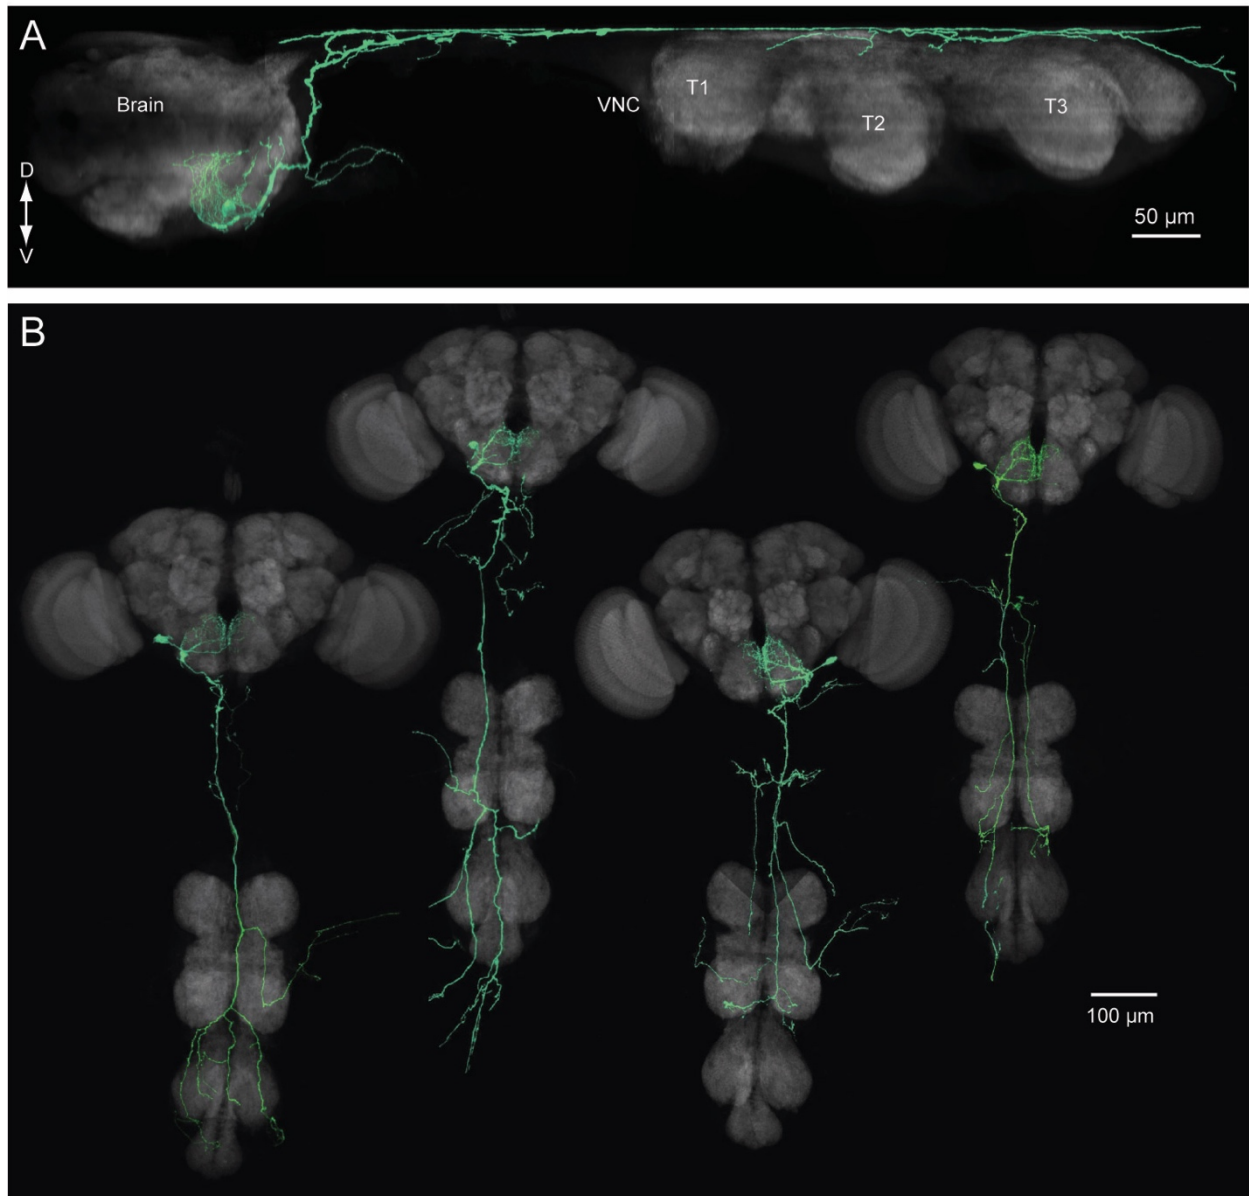

**Figure 7. figure supplement 4. DN projecting outside the VNC.**

**(A)** Lateral view of DNg28 morphology. The DN has smooth processes in the GNG, and varicose processes in the nerve fiber. The axon mainly runs through the dorsal surface of the VNC.

**(B)** Four examples of DNg28 morphology. The smooth processes in the brain are similar, whereas the axon pathways are highly variable.

Figure 9—figure supplement 1

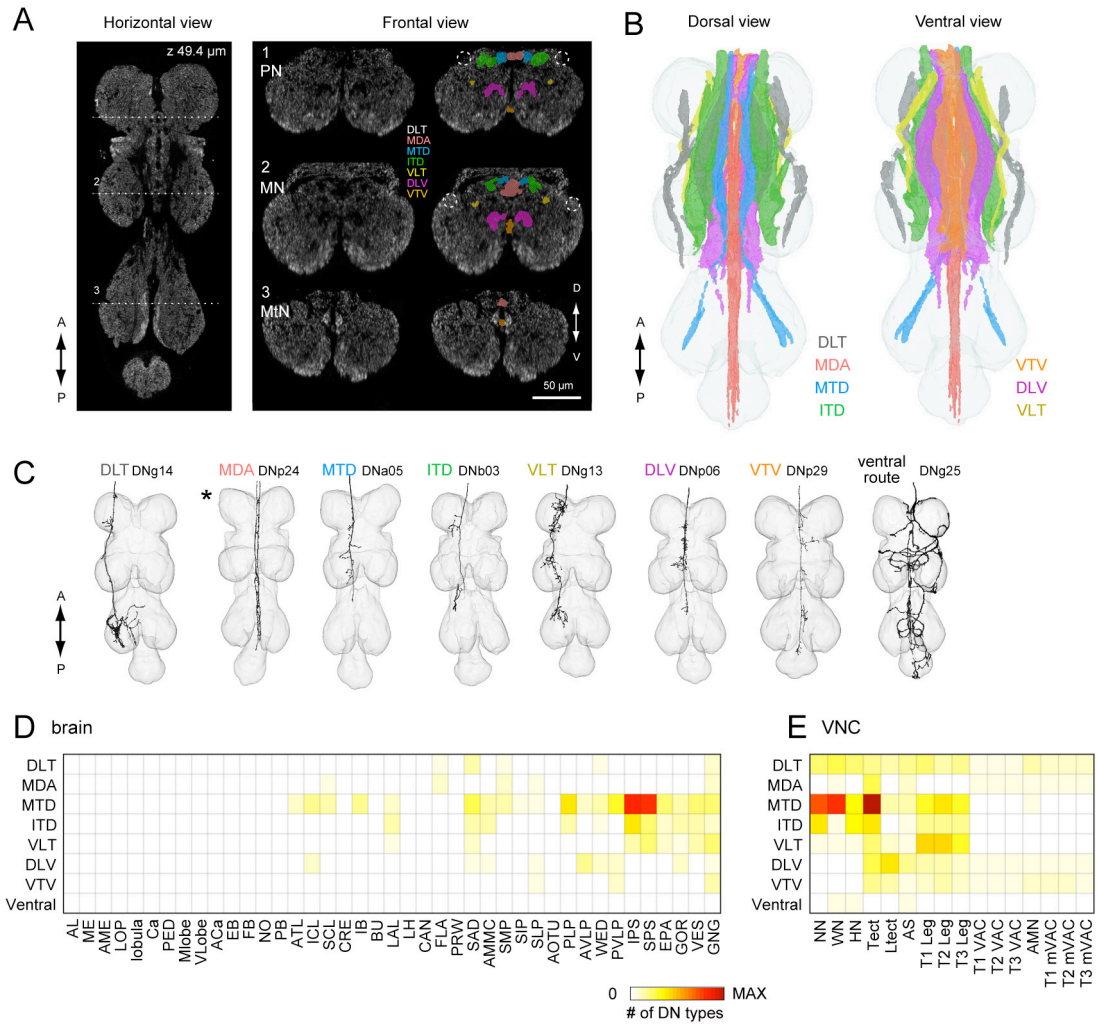

**Figure 9. figure supplement 1. Neuronal pathways of DNs.**

(A) Location of the DN tracts. Horizontal view of the whole VNC (*left*) and frontal sections of each segment are shown (*right*). Each frontal plane corresponds to the depth shown in dotted lines in the left panel. The tracts are labeled by color.

(B) Reconstruction of neuronal pathways in the VNC. Segmentation data used is from Boerner & Duch, 2010.

(C) Examples of DNs running through 8 different neuronal pathways. For each image, a DN on one side was reconstructed from confocal stacks.

(D-E) The relationship between the brain (D) or VNC (E) innervation and tract usage. The number of DN types are shown with pseudo-color.



Figure 10—figure supplement 1

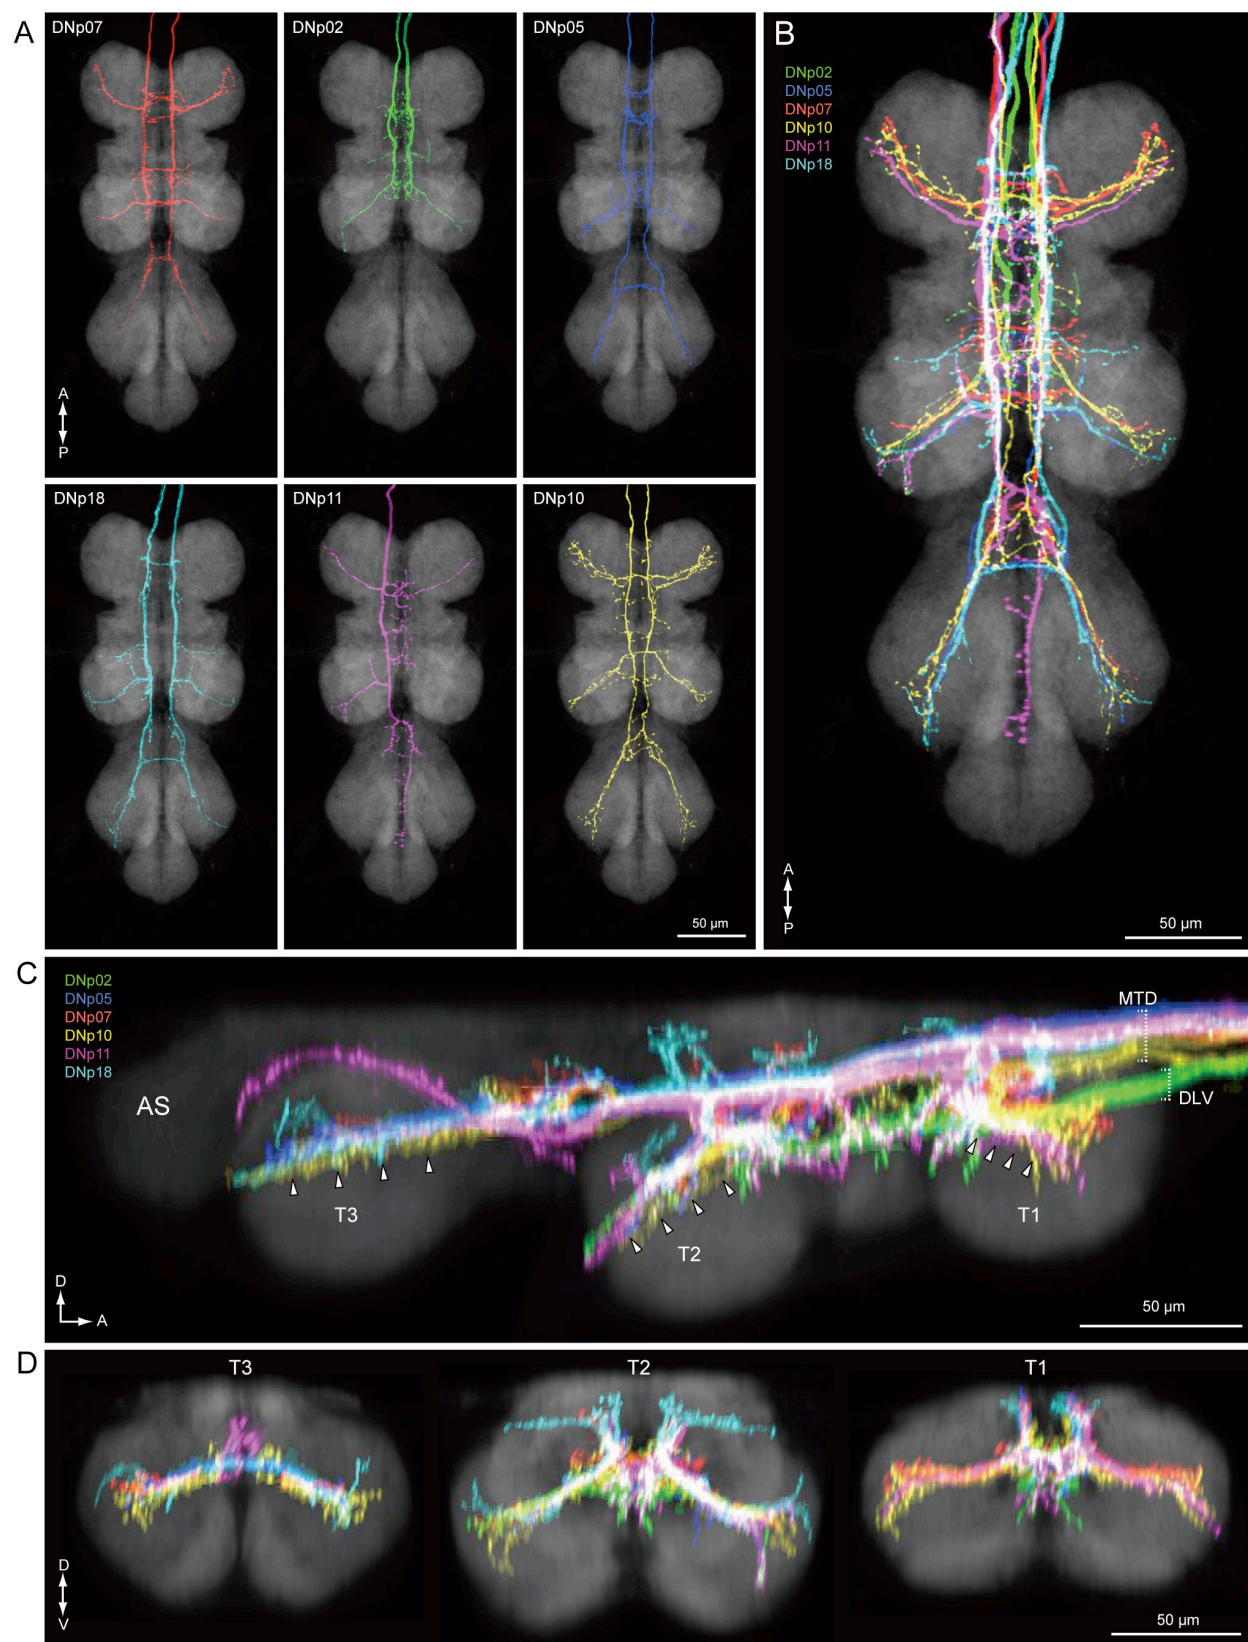

**Figure 10. figure supplement 1. DNs running through the oblique tract.**

**(A)** Morphologies of six DNs with axons in the oblique tract.

**(B-D)** Merged horizontal (B), sagittal (C), and frontal (D) views of the six DNs shown in panel (A), showing overlap and formation of the oblique tract. Individual data are compared by registration to a standard VNC. The DNs running through the MTD tract (DNp07, p05, p18, p11, and p10) run dorsally to the DN running through the DLV (DNp02).

Figure 10—figure supplement 2

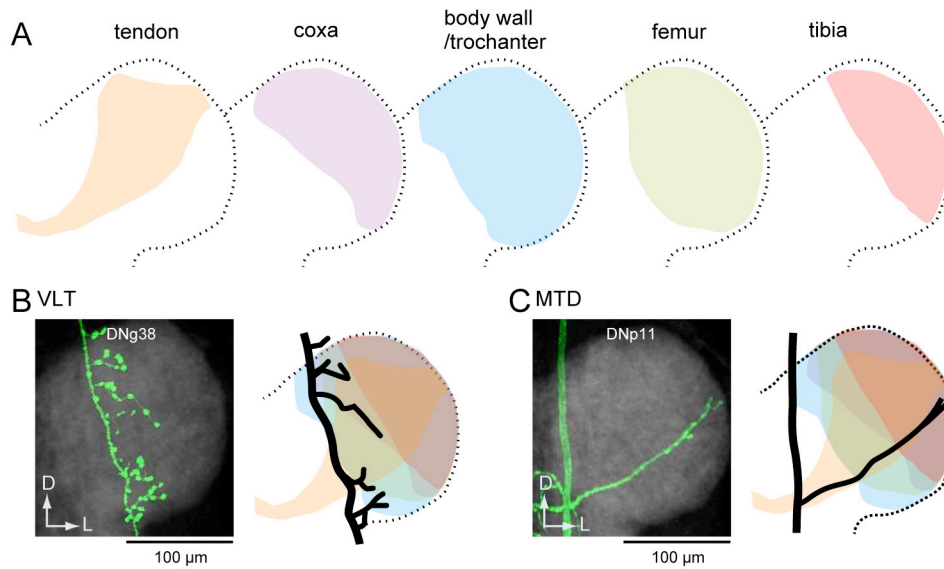

**Figure 10. figure supplement 2. Potential overlap between DNs and leg motor neurons.**

(A) Leg motor neuron dendrites form a myotopic map in each leg neuropil. Dendritic regions for motor neurons corresponding to different leg segments are schematized as different colored regions, based on Brierley et al., 2012.

(B) Axonal projection of DNg38 running through the VLT tract. Right panel shows potential overlap between the DN (black) and dendrites of leg motor neurons for proximal leg joints (color). The DN may not overlap with motor neurons for distal segments, such as tibia (red).

(C) Axonal projection of DNp11 running through the MTD and oblique tracts. Left panels shows potential overlap between the DN (black) and dendrites of leg motor neurons (color). The DN may overlap leg motor neurons for all segments.

Figure 11—figure supplement 1

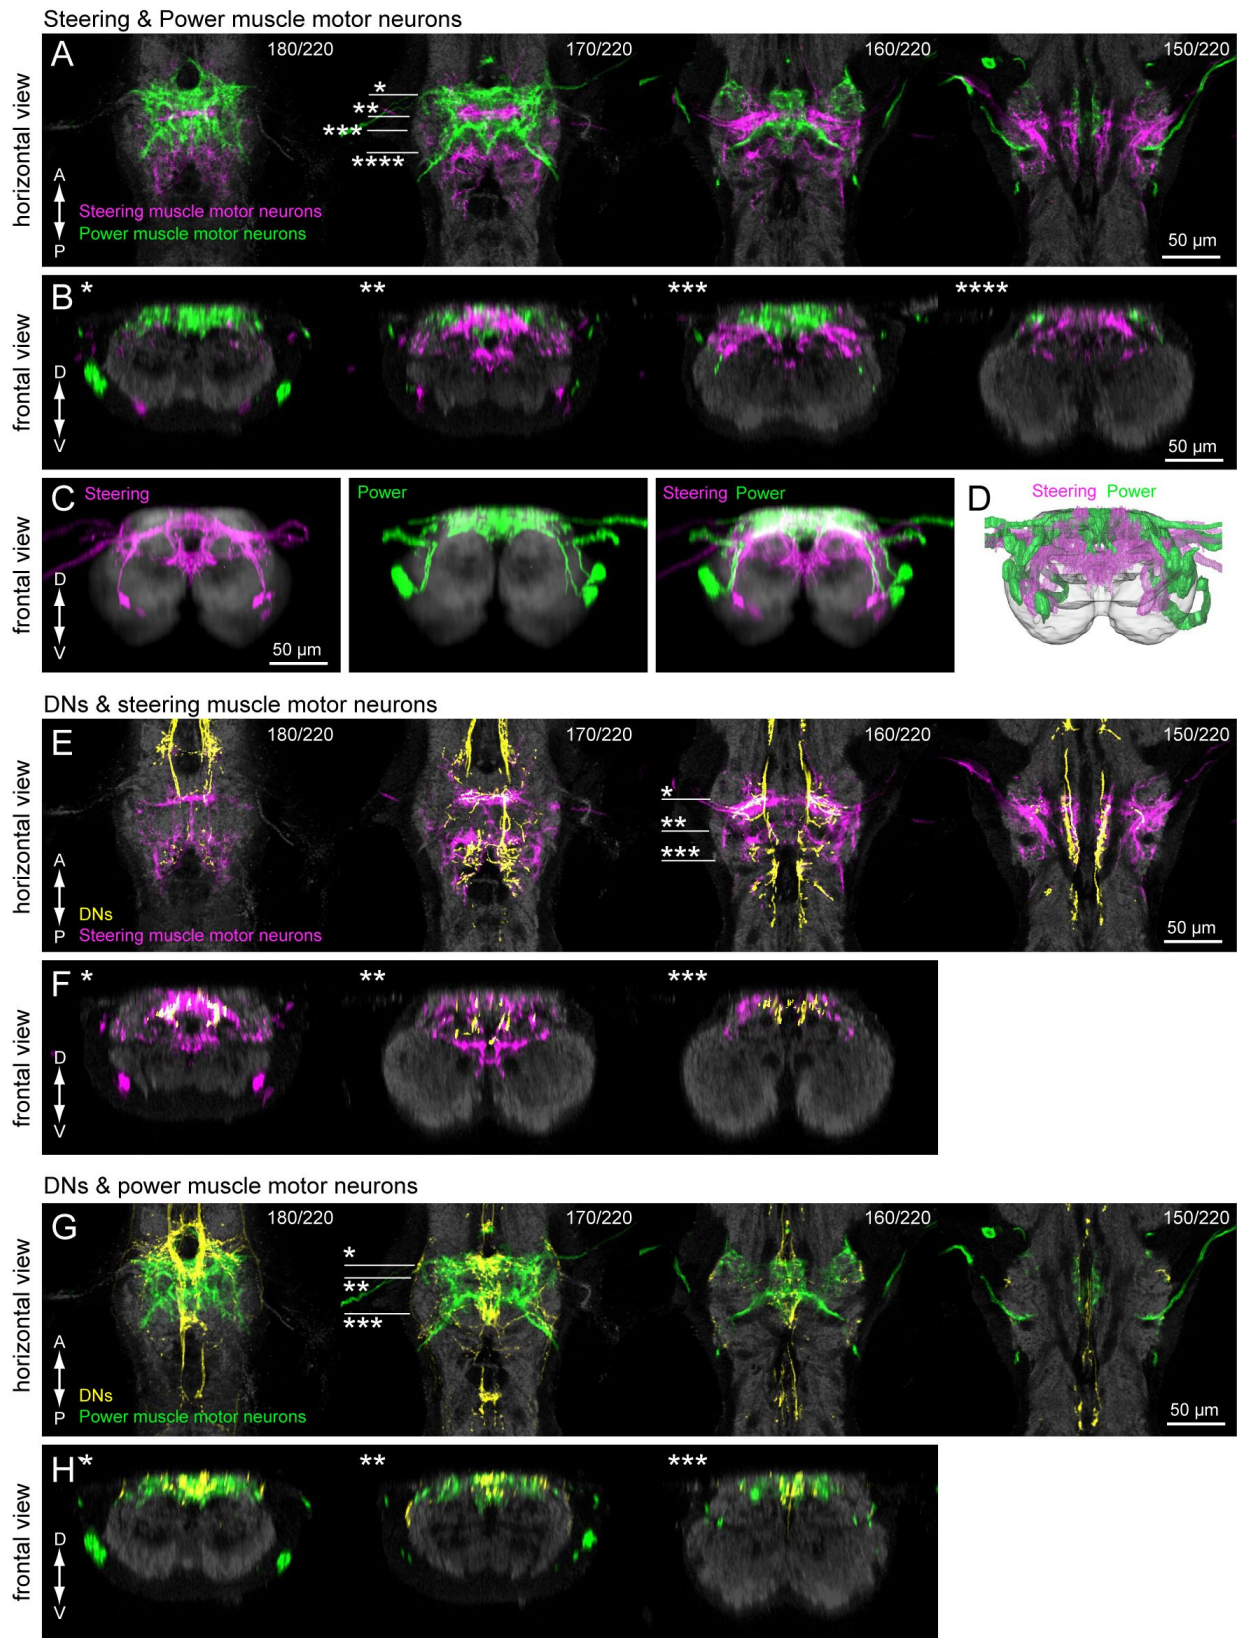



**Figure 11. figure supplement 1. Innervation in the wing neuropil of DNs and interneurons.**

**(A,B)** Confocal stacks of power muscle (green) and steering muscle (magenta) motor neurons (MNs). horizontal (A) and frontal (B) views are shown. For each image, the depth of the horizontal plane is shown in the *top-right* (A). The depth in anterior-posterior axis shown in (B) corresponds to the line markers shown in (A). The innervation profile of power and steering MNs is largely segregated.

**(C)** Maximum intensity projection of T2 segment for steering muscle MNs (*left*), power muscle MNs (*center*) and both with counterstaining (*right*).

**(D)** Three-dimensional reconstruction of dendritic innervation of power and steering muscle motor neurons.

**(E,F)** Confocal stacks of steering muscle MNs (magenta) and a group of type-I DNs (yellow). Horizontal (E) and frontal views are shown (F).

**(G,H)** Confocal stacks of populations of power muscle motor neurons (green) and a population of type-II DNs (yellow). Dorsal (G) and frontal (H) views are shown.

Figure 11—figure supplement 2

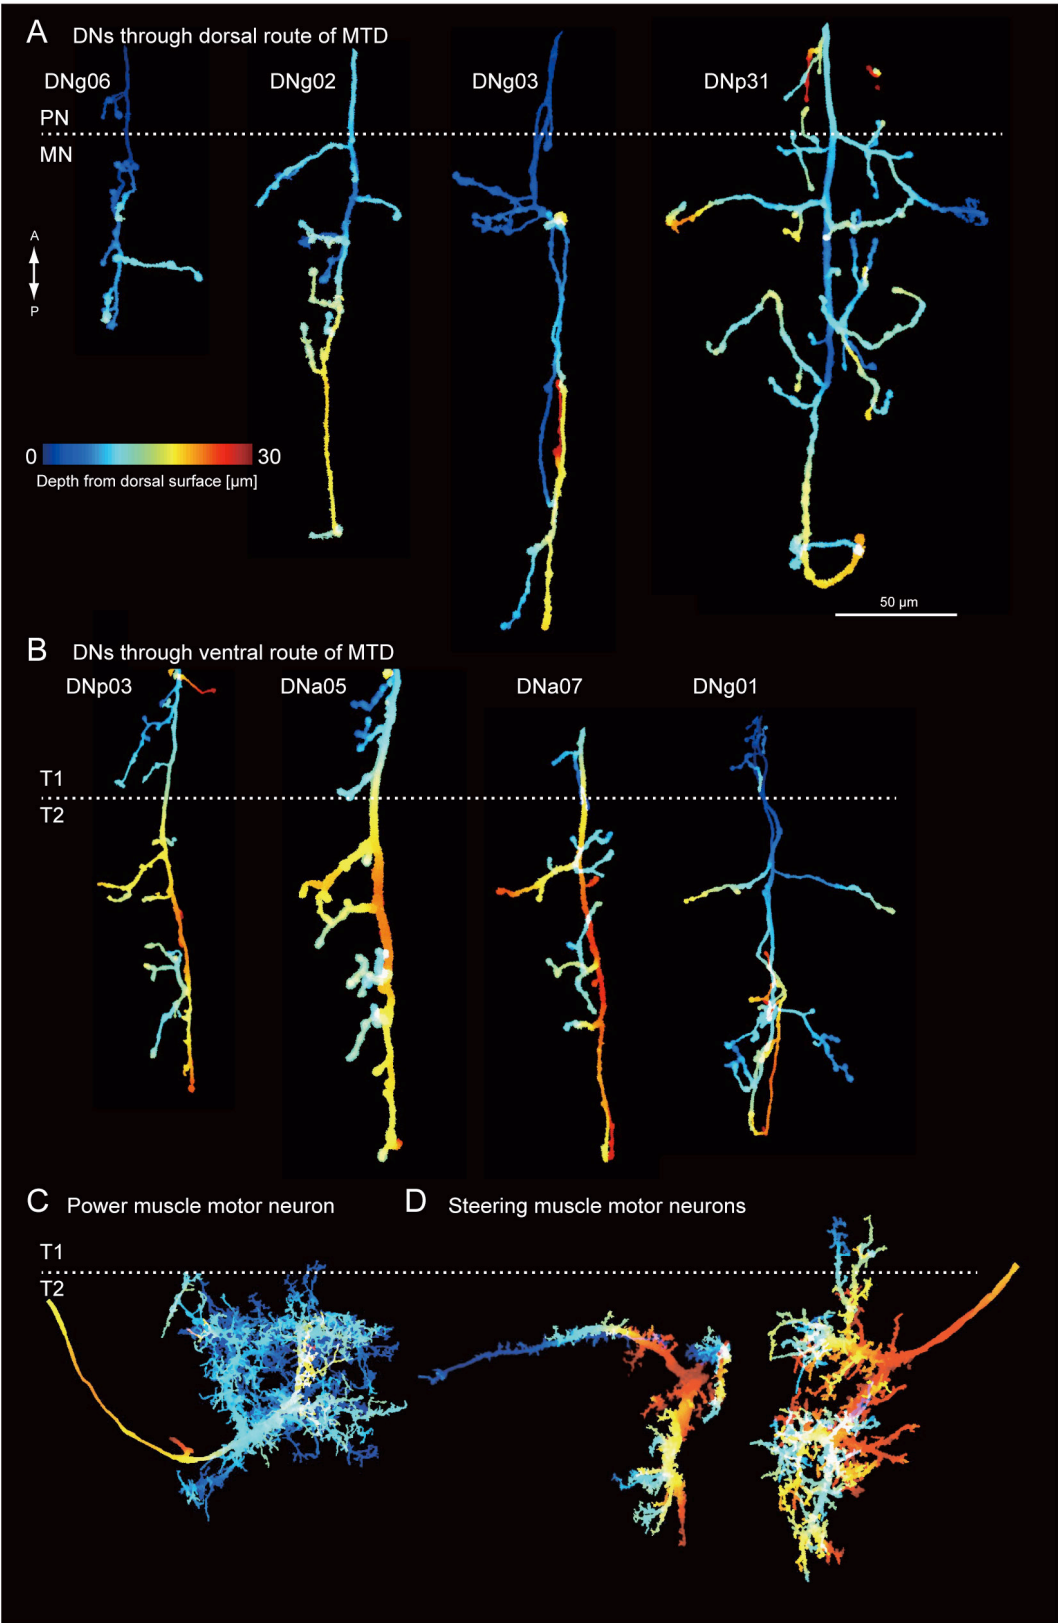

**Figure 11. figure supplement 2. Innervation in the wing neuropil of DNs and interneurons.**

**(A)** Reconstructed morphology of four different DNs running through the dorsal route of the MTD shown with pseudo-color for depth. Cold and hot colors indicate the dorsal and ventral part of the wing neuropil, respectively.

**(B)** As in (A) for four DNs running through the ventral route of the MTD. The anteriormost branch mostly shows wider innervation, which is located deeper than those in DNs through dorsal tract of the MTD (A).

**(C)** As in (A) for a power muscle MN for the dorsoventral muscle.

**(D)** As in (A) for steering muscle MNs for basalar 1 (*left*) and 2 (*right*).

Figure 12—figure supplement 1

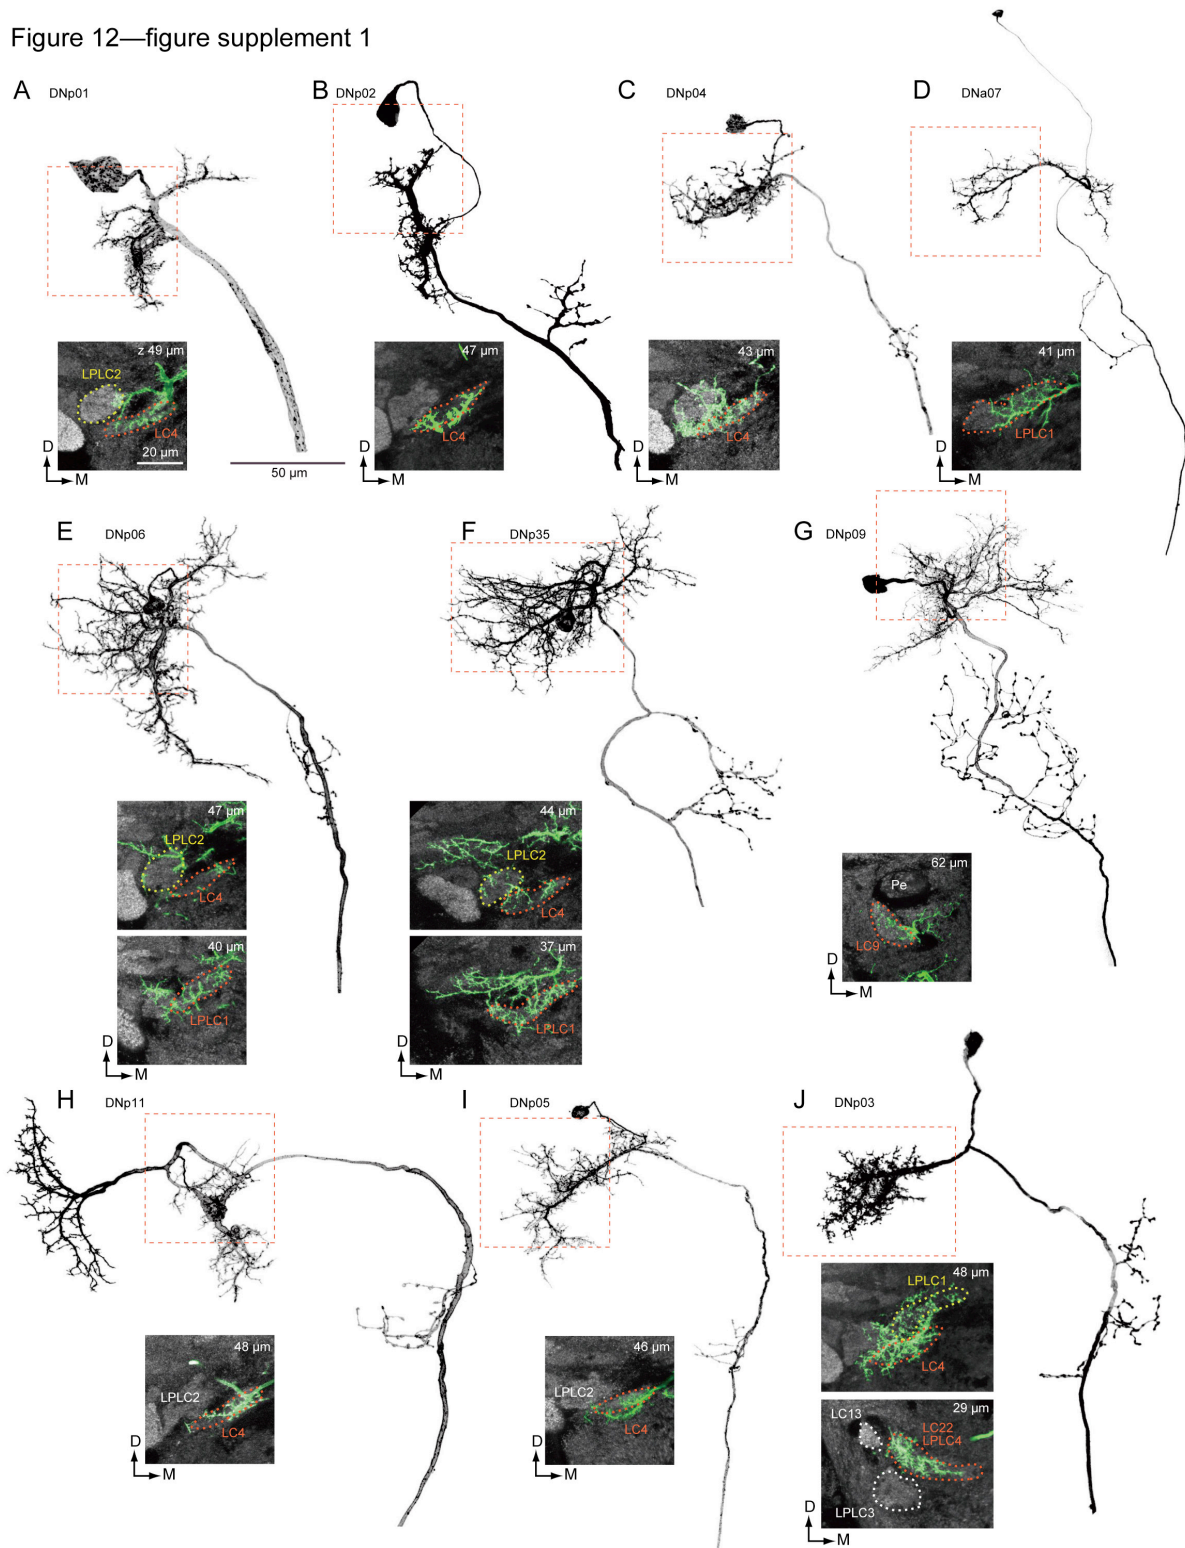



**Figure 12. figure supplement 1. Morphology of DNs from optic glomeruli in the posterior ventral protocerebrum.**

High resolution (63x) confocal images of the 10 different DNs innervating the optic glomeruli in the PVLP. Neurite morphology in the brain is shown, as well as images at the depth of the optic glomeruli (*insets*). Seven DNs descend on the ipsilateral side and the others descend on the contralateral side. DNs have smooth process in one or a few optic glomeruli and most of DNs (9 out of 10) have varicose process in the GNG. DN cell membrane, green; NC82 neuropil stain, grey; yellow and red dotted circles indicate individual glomeruli.

Figure 12—figure supplement 2

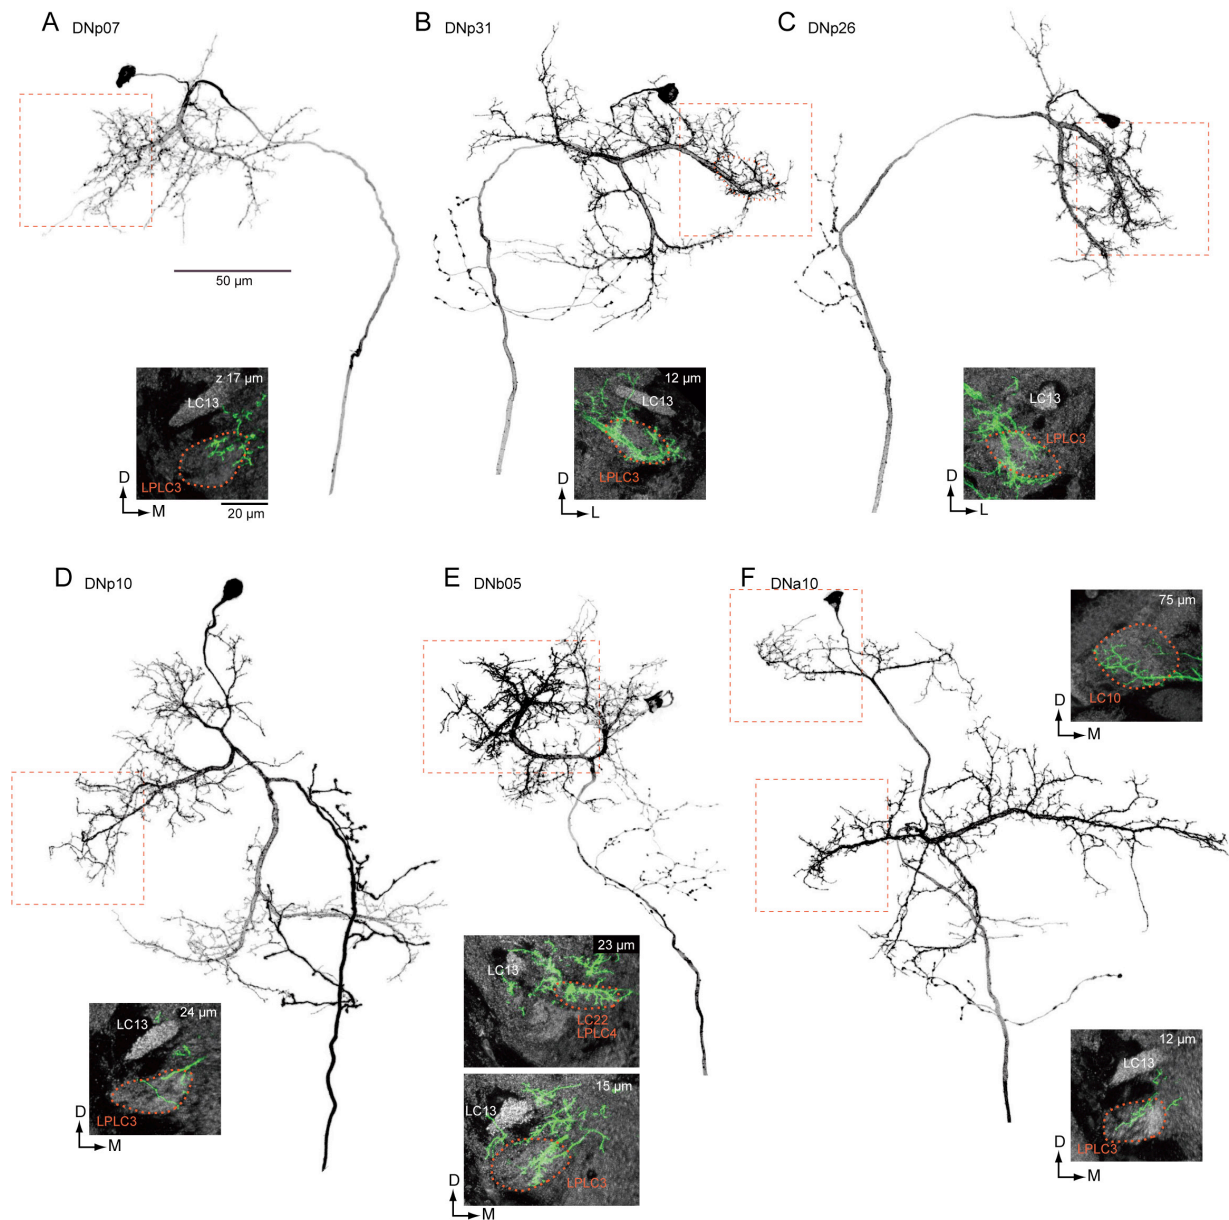

**Figure 12. figure supplement 2. Morphology of DNs from optic glomeruli in the posterior lateral protocerebrum.**

High resolution (63x) confocal images of the six different DNs innervating the PLP optic glomeruli.

Images as in Figure 10. The majority of these DNs (5 out of 6) descend contralaterally through the neck connective.

Figure 12—figure supplement 3

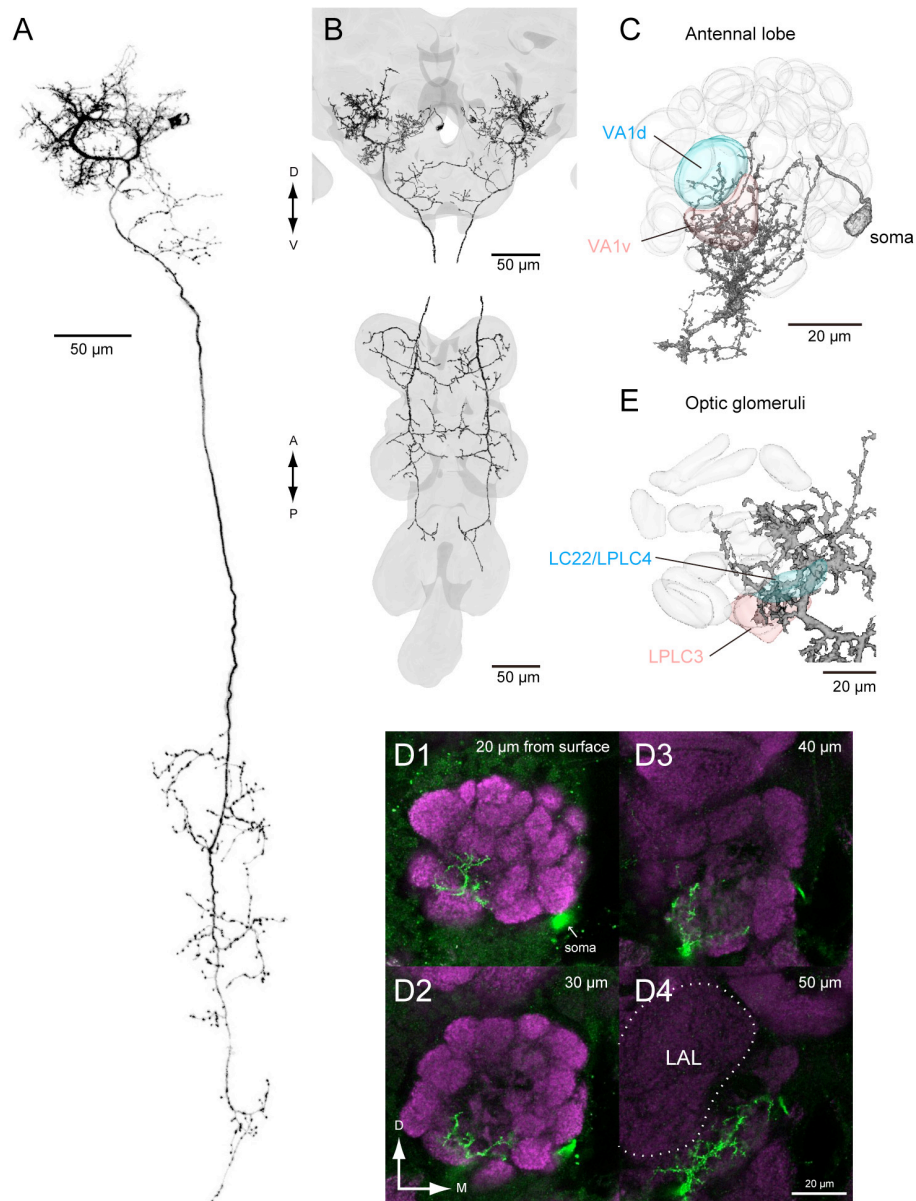

**Figure 12. figure supplement 3. Morphology of a DN innervating both olfactory and optic glomeruli.**

(A) Morphology of DNb05.

(B) Segmentation of DNb05 on both sides. The outer shapes of the brain and VNC are shown with gray.

(C) Reconstruction of DN innervation in the antennal lobe. Neuron and glomeruli are shown in black and gray, respectively. The glomeruli innervated by the DN are shown in color.

(D) Confocal stacks of DN innervation in the antennal lobe. Plane depth indicated in *top-right* of images.

(E) Reconstruction of DN innervation to the optic glomeruli. Colors as in (C)





| Name  | Similar neuron                                             | Citation                                                      |
|-------|------------------------------------------------------------|---------------------------------------------------------------|
| DNa01 | aSP3<br>VGlut-F-200324                                     | Yu et al., 2010<br>FlyCircuit                                 |
| DNa05 | DNDC 2-2                                                   | Gronenberg & Strausfeld, 1992                                 |
| DNa10 | VGlut-F-200121                                             | FlyCircuit                                                    |
| DNb01 | VGlut-F-500726                                             | FlyCircuit                                                    |
| DNb02 | fru-F-100073, VGlut-F-300245                               | FlyCircuit                                                    |
| DNb05 | T1<br>AMMC-Di7                                             | Stocker et al., 1990<br>Matsuo et al., 2016                   |
| DNd01 | fru-F-500429                                               | FlyCircuit                                                    |
| DNd02 | OA-VL1                                                     | Busch et al., 2009                                            |
| DNd03 | OA-VL2                                                     | Busch et al., 2009                                            |
| DNg07 | aPN<br>VGlut-F-500136                                      | Vaughan et al., 2014<br>FlyCircuit                            |
| DNg08 | VGlut-F-400822                                             | FlyCircuit                                                    |
| DNg12 | aDN1                                                       | Hampel et al., 2015                                           |
| DNg13 | pSG3                                                       | Yu et al., 2010                                               |
| DNg15 | AMMC-Db5                                                   | Matsuo et al., 2016                                           |
| DNg16 | VGlut-F-600012, VGlut-F-200371                             | FlyCircuit                                                    |
| DNg25 | one of CCAP                                                | Lee et al. 2013, Fig1G                                        |
| DNg26 | aSG3<br>fru-F-900021<br>one neuron in hugS3-GAL4           | Yu et al., 2010<br>FlyCircuit<br>Melcher & Pankratz, 2005     |
| DNg28 | 2 large cell in TRH-Gal4                                   | Alekseyenko et al., 2010                                      |
| DNg29 | AMMC-Db7                                                   | Matsuo et al., 2016                                           |
| DNg30 | ICLI                                                       | Jiang et al., 2013                                            |
| DNg31 | fru-F-000167                                               | FlyCircuit                                                    |
| DNg34 | OA-VPM1/aDT8                                               | Busch et al., 2009; Yu et al., 2010                           |
| DNg38 | Gad1-F-500376                                              | FlyCircuit                                                    |
| DNg39 | VGlut-F-300006, Gad1-F-000424                              | FlyCircuit                                                    |
| DNp01 | giant descending neuron                                    | Milde & Strausfeld, 1990                                      |
| DNp02 | lateral giant<br>P3b                                       | Milde & Strausfeld, 1990<br>Kimura et al., 2008               |
| DNp03 | Cha-F-200252                                               | FlyCircuit                                                    |
| DNp04 | Ipsilateral small neuron                                   | Milde & Strausfeld, 1990                                      |
| DNp05 | contralateral giant mimetics<br>Vglut-F-500311<br>AMMC-Db2 | Milde & Strausfeld, 1990<br>FlyCircuit<br>Matsuo et al., 2016 |
| DNp06 | Inferior giant<br>AMMC-Di5                                 | Milde & Strausfeld, 1990<br>Matsuo et al., 2016               |
| DNp08 | VGlut-F-500767                                             | FlyCircuit                                                    |
| DNp11 | LDN<br>AMMC-Db3                                            | Nässel & Strausfeld, 1982<br>Matsuo et al., 2016              |
| DNp13 | fru-F-800097                                               | FlyCircuit                                                    |
| DNp14 | VGlut-F-300326                                             | FlyCircuit                                                    |
| DNp15 | VGlut-F-800293, Cha-F-700077<br>DNHS1                      | FlyCircuit<br>Suver et al., 2016                              |
| DNp16 | PSp2 (neuroblast)                                          | Ito et al., 2013                                              |
| DNp17 | PSp2 (neuroblast)                                          | Ito et al., 2013                                              |
| DNp18 | VGlut-F-200226, fru-F-700251                               | FlyCircuit                                                    |
| DNp20 | DNOVS1                                                     | Strausfeld & Bassemir, 1985                                   |
| DNp22 | DNOVS2 or DNOVS3<br>VGlut-F-500165, VGlut-F-200420         | Strausfeld & Bassemir, 1985<br>FlyCircuit                     |
| DNp23 | Cha-F-100034                                               | FlyCircuit                                                    |
| DNp24 | E0585-F-200004                                             | FlyCircuit                                                    |
| DNp29 | SP1                                                        | Nässel, 1993                                                  |
| DNp30 | GAMDN                                                      | Mu et al., 2014                                               |
| DNp32 | AL-DN1                                                     | Tanaka et al., 2012                                           |
| DNp33 | AMMC D1                                                    | Matsuo et al., 2014                                           |
| DNx01 | large campaniform cell                                     | Nässel et al., 1984                                           |

**Supplementary Table 2. Descending neurons with similar morphology reported in *Drosophila melanogaster* and other species.**

Full references listed below in “Additional references for Supplementary Table 2.”

| Robot ID | LineName | Genotype stock name                 | DN type                  | quality |
|----------|----------|-------------------------------------|--------------------------|---------|
| 3018528  | SS02536  | BJD_111C04_BB_21-x-BJD_126F02_AV_01 | DNa05                    | A       |
| 3016845  | SS01546  | BJD_111C04_BB_21-x-BJD_104E03_AV_01 | DNa05, DNa07             | A       |
| 3016859  | SS01560  | GMR_31H10_XA_21-x-BJD_111C04_AV_01  | DNa07                    | A       |
| 3018296  | SS02393  | BJD_104B12_BB_21-x-GMR_80H02_AV_01  | DNa08                    | A       |
| 3018272  | SS02370  | GMR_55D12_XA_21-x-GMR_72H04_XD_01   | DNb03                    | A       |
| 3018544  | SS02552  | GMR_55D12_XA_21-x-BJD_119B11_AV_01  | DNb03                    | A       |
| 3015812  | SS01051  | BJD_113B12_BB_21-x-BJD_110E05_AV_01 | DNb05                    | A       |
| 3018681  | SS02631  | GMR_20C04_XA_21-x-BJD_113E03_AV_01  | DNb06                    | A       |
| 3020785  | SS04161  | GMR_59A06_XA_21-x-GMR_64B11_XD_01   | DNc01                    | A       |
| 3016869  | SS01570  | BJD_103G03_BB_21-x-BJD_121A10_AV_01 | DNd02, DNd03             | A       |
| 3017890  | SS02111  | BJD_119A05_BB_21-x-BJD_105G01_AV_01 | DNg10                    | A       |
| 3016846  | SS01547  | BJD_111G08_BB_21-x-BJD_105G01_AV_01 | DNg10                    | A       |
| 3016878  | SS01579  | BJD_113G07_BB_21-x-GMR_81C11_XD_01  | DNg11                    | A       |
| 3018530  | SS02538  | BJD_118A10_BB_21-x-BJD_123E03_AV_01 | DNg01                    | A       |
| 3018151  | SS02285  | BJD_114G06_BB_21-x-BJD_121E05_AV_01 | DNg01                    | A       |
| 3015830  | SS01069  | GMR_38H06_XA_21-x-BJD_104A09_AV_01  | DNg14                    | A       |
| 3020782  | SS04158  | GMR_53D12_XA_21-x-BJD_104A09_AV_01  | DNg14                    | A       |
| 3018145  | SS02279  | BJD_137F08_BB_21-x-BJD_119H02_AV_01 | DNg17                    | A       |
| 3013808  | SS00898  | BJD_137F08_BB_21-x-BJD_103G08_AV_01 | DNg17                    | A       |
| 3018675  | SS02625  | BJD_111B02_BB_21-x-BJD_110C03_AV_01 | DNg02                    | A       |
| 3015807  | SS01046  | BJD_105D02_BB_21-x-GMR_24C07_XD_01  | DNg24                    | A       |
| 3015813  | SS01052  | BJD_122B03_BB_21-x-GMR_22D06_XD_01  | DNg25                    | A       |
| 3015820  | SS01059  | GMR_21F01_XA_21-x-GMR_22D06_XD_01   | DNg25                    | A       |
| 3016857  | SS01558  | GMR_27E07_XA_21-x-BJD_109H06_AV_01  | DNg26                    | A       |
| 3016856  | SS01557  | GMR_13D04_XA_21-x-GMR_65D05_XD_01   | DNg27                    | A       |
| 3020783  | SS04159  | GMR_59F08_XA_21-x-GMR_47H03_XD_01   | DNg29                    | A       |
| 3018540  | SS02548  | GMR_42B02_XA_21-x-BJD_119F07_AV_01  | DNg03                    | A       |
| 3018281  | SS02378  | GMR_61A01_XA_21-x-GMR_13B05_XD_01   | DNg30                    | A       |
| 3018291  | SS02388  | GMR_14H09_XA_21-x-GMR_61A01_AW_01   | DNg30                    | A       |
| 3015815  | SS01054  | GMR_14H09_XA_21-x-GMR_56H09_XD_01   | DNg30                    | A       |
| 3015838  | SS01077  | GMR_61A01_XA_21-x-BJD_102G11_AV_01  | DNg30                    | A       |
| 3018182  | SS02316  | GMR_14H09_XA_21-x-BJD_127A06_AV_01  | DNg30                    | A       |
| 3018316  | SS02324  | GMR_42B02_XA_21-x-BJD_127F10_AV_01  | DNg07                    | A       |
| 3015835  | SS01074  | GMR_42B02_XA_21-x-GMR_89B01_XD_01   | DNg07                    | A       |
| 3016896  | SS01597  | GMR_42B02_XA_21-x-BJD_101D01_AV_01  | DNg07                    | A       |
| 3018539  | SS02547  | GMR_42B02_XA_21-x-BJD_119A06_AV_01  | DNg07                    | A       |
| 3018546  | SS02554  | GMR_73A05_BB_21-x-BJD_119A06_AV_01  | DNg07                    | A       |
| 3018685  | SS02635  | GMR_42B02_XA_21-x-BJD_129H09_AV_01  | DNg07, DNg08             | A       |
| 3018165  | SS02299  | GMR_10A12_XA_21-x-BJD_125A05_AV_01  | DNp01                    | A       |
| 3016907  | SS01608  | GMR_94E01_XA_21-x-BJD_115F05_AV_01  | DNp10                    | A       |
| 3018288  | SS02385  | GMR_94E01_XA_21-x-GMR_48E11_XD_01   | DNp10                    | A       |
| 3015810  | SS01049  | BJD_110A11_BB_21-x-BJD_115F05_AV_01 | DNp10                    | A       |
| 3016879  | SS01580  | BJD_115F05_BB_21-x-GMR_48E11_XD_01  | DNp10                    | A       |
| 3015839  | SS01078  | GMR_69C11_XA_21-x-GMR_81D05_XD_01   | DNp20                    | A       |
| 3015817  | SS01056  | GMR_17A04_XA_21-x-GMR_24A03_XD_01   | DNp27                    | A       |
| 3016888  | SS01589  | GMR_20C03_XA_21-x-GMR_23C07_XD_01   | DNp27                    | A       |
| 3018652  | SS02618  | GMR_11H10_XA_21-x-BJD_104H02_AV_01  | DNp28                    | A       |
| 3016895  | SS01596  | GMR_29F12_XA_21-x-GMR_37G07_XD_01   | DNp03                    | A       |
| 3018290  | SS02387  | GMR_60B12_XA_21-x-GMR_58E05_XD_01   | DNp04                    | A       |
| 3015841  | SS01080  | GMR_84B12_XA_21-x-BJD_105D02_AV_01  | DNp04                    | A       |
| 3016843  | SS01544  | BJD_105D02_BB_21-x-BJD_124C05_AV_01 | DNp04, DNp02             | A       |
| 3018158  | SS02292  | BJD_107A06_BB_21-x-BJD_124C05_AV_01 | DNp04, DNp06             | A       |
| 3018122  | SS02256  | BJD_107A12_BB_21-x-BJD_107A06_AV_01 | DNp06                    | A       |
| 3018142  | SS02276  | BJD_113F07_BB_21-x-BJD_118E07_AV_01 | DNp07                    | A       |
| 3016839  | SS01540  | BJD_104B12_BB_21-x-GMR_38F04_XD_01  | DNp09                    | A       |
| 3018176  | SS02310  | BJD_118E07_BB_21-x-BJD_126F02_AV_01 | several types of DNa DNs | A       |
| 3007652  | SS00731  | GMR_22C05_XA_21-x-GMR_56G08_XD_01   | DNa01                    | B       |
| 3007651  | SS00730  | GMR_75C10_XA_21-x-GMR_87D07_XD_01   | DNa02                    | B       |
| 3018287  | SS02384  | BJD_118E07_BB_21-x-GMR_47D05_AV_01  | DNa04, DNa10             | B       |
| 3016851  | SS01552  | BJD_115A02_BB_21-x-BJD_111C04_AV_01 | DNa05, DNa7              | B       |
| 3016871  | SS01572  | BJD_105D02_BB_21-x-BJD_100H09_AV_01 | DNa05, DNp11             | B       |
| 3016840  | SS01541  | BJD_104E03_BB_21-x-GMR_56G08_XD_01  | DNa07                    | B       |
| 3016841  | SS01542  | BJD_104E03_BB_21-x-GMR_87B09_XD_01  | DNa07                    | B       |
| 3016870  | SS01571  | BJD_104E03_BB_21-x-BJD_100E01_AV_01 | DNa07                    | B       |
| 3018286  | SS02383  | BJD_103G04_BB_21-x-GMR_45H03_AV_01  | DNb01                    | B       |
| 3018534  | SS02542  | BJD_144E04_BB_21-x-BJD_103G04_AV_01 | DNb01                    | B       |
| 3018299  | SS02396  | GMR_21F05_XA_21-x-GMR_93B10_AV_01   | DNb02                    | B       |
| 3016899  | SS01600  | GMR_59B10_XA_21-x-GMR_21F05_XD_01   | DNb02                    | B       |

Supplementary Table 3. Continued on next page.

|         |         |                                     |                     |   |
|---------|---------|-------------------------------------|---------------------|---|
| 3015821 | SS01060 | GMR_21F05_XA_21-x-GMR_21H11_XD_01   | DNb02               | B |
| 3018298 | SS02395 | BJD_120G05_BB_21-x-GMR_83B06_AV_01  | DNc02               | B |
| 3016844 | SS01545 | BJD_109D01_BB_21-x-BJD_102A03_AV_01 | DNd02               | B |
| 3016874 | SS01575 | BJD_109D01_BB_21-x-BJD_120E12_AV_01 | DNd02               | B |
| 3016868 | SS01569 | BJD_103G03_BB_21-x-BJD_111F03_AV_01 | DNd02, DNd03        | B |
| 3016875 | SS01576 | BJD_109D01_BB_21-x-GMR_70C05_XD_01  | DNd02, DNd03        | B |
| 3018144 | SS02278 | BJD_111G08_BB_21-x-BJD_119A05_AV_01 | DNg10               | B |
| 3018294 | SS02391 | GMR_81C11_XA_21-x-GMR_66B05_AV_01   | DNg11               | B |
| 3016849 | SS01550 | BJD_113G07_BB_21-x-BJD_126F01_AV_01 | DNg11               | B |
| 3016865 | SS01566 | GMR_66B05_XA_21-x-GMR_85H06_AV_01   | DNg11               | B |
| 3018651 | SS02617 | BJD_129H09_BB_21-x-BJD_126F01_AV_01 | DNg11               | B |
| 3018643 | SS02609 | BJD_113D11_BB_21-x-BJD_113F09_AV_01 | DNg12               | B |
| 3018642 | SS02608 | BJD_113D11_BB_21-x-BJD_113E03_AV_01 | DNg12               | B |
| 3018125 | SS02259 | BJD_117F04_BB_21-x-BJD_109F06_AV_01 | DNg13               | B |
| 3016866 | SS01567 | GMR_88F03_XA_21-x-BJD_109F06_AV_01  | DNg13               | B |
| 3018141 | SS02275 | BJD_122H12_BB_21-x-BJD_118A10_AV_01 | DNg01               | B |
| 3016864 | SS01565 | GMR_60B11_XA_21-x-GMR_83B04_XD_01   | DNg01               | B |
| 3018280 | SS02377 | BJD_105A09_BB_21-x-BJD_127H02_AV_01 | DNg15               | B |
| 3016842 | SS01543 | BJD_105A07_BB_21-x-BJD_107F12_AV_01 | DNg16               | B |
| 3018674 | SS02624 | BJD_110C03_BB_21-x-BJD_111B02_AV_01 | DNg02               | B |
| 3018684 | SS02634 | GMR_42B02_XA_21-x-BJD_118C08_AV_01  | DNg02               | B |
| 3015834 | SS01073 | GMR_42B02_XA_21-x-GMR_65C10_XD_01   | DNg02               | B |
| 3016860 | SS01561 | GMR_42B02_XA_21-x-BJD_106G05_AV_01  | DNg02               | B |
| 3007653 | SS00732 | GMR_14F03_XA_21-x-GMR_24C07_XD_01   | DNg24               | B |
| 3016901 | SS01602 | GMR_64B03_XA_21-x-GMR_29G08_XD_01   | DNg25               | B |
| 3013833 | SS00923 | BJD_109B01_BB_21-x-BJD_104F07_AV_01 | DNg26               | B |
| 3018123 | SS02257 | GMR_10A07_XA_21-x-BJD_109B01_AV_01  | DNg26               | B |
| 3015822 | SS01061 | GMR_22H02_XA_21-x-GMR_20F03_XD_01   | DNg26               | B |
| 3015825 | SS01064 | GMR_27E07_XA_21-x-GMR_14D01_XD_01   | DNg26               | B |
| 3016892 | SS01593 | GMR_27E07_XA_21-x-GMR_20F03_XD_01   | DNg26               | B |
| 3015824 | SS01063 | GMR_24F06_BB_21-x-GMR_45E06_XD_01   | DNg28               | B |
| 3016863 | SS01564 | GMR_44A07_XA_21-x-BJD_114C04_AV_01  | DNg28               | B |
| 3015836 | SS01075 | GMR_47H03_XA_21-x-GMR_59F08_XD_01   | DNg29               | B |
| 3018683 | SS02633 | GMR_42B02_XA_21-x-BJD_102B12_AV_01  | DNg03               | B |
| 3016887 | SS01588 | GMR_14H09_XA_21-x-GMR_13B05_XD_01   | DNg30               | B |
| 3016852 | SS01553 | BJD_119E05_BB_21-x-GMR_89A03_XD_01  | DNg30               | B |
| 3016903 | SS01604 | GMR_73A05_XA_21-x-BJD_100F04_AV_01  | DNg07               | B |
| 3007648 | SS00727 | GMR_14A01_XA_21-x-GMR_79H02_XD_01   | DNp01               | B |
| 3007647 | SS00726 | GMR_25C08_XA_21-x-GMR_68A06_XD_01   | DNp01               | B |
| 3018963 | SS02891 | BJD_110D01_BB_21-x-BJD_105F11_AV_01 | DNp11               | B |
| 3016855 | SS01556 | GMR_11E07_XA_21-x-GMR_77F05_AV_01   | DNp15               | B |
| 3007656 | SS00735 | GMR_49A07_XA_21-x-GMR_55A03_XD_01   | DNp16               | B |
| 3018545 | SS02553 | GMR_67E08_XA_21-x-BJD_137F12_AV_01  | DNp17               | B |
| 3018295 | SS02392 | BJD_119C06_BB_21-x-GMR_69C11_XD_01  | DNp18               | B |
| 3015814 | SS01053 | BJD_124F08_BB_21-x-GMR_24A03_XD_01  | DNp02               | B |
| 3016853 | SS01554 | BJD_124F08_BB_21-x-BJD_124C05_AV_01 | DNp02               | B |
| 3018282 | SS02379 | BJD_110D01_BB_21-x-GMR_15E12_AV_01  | DNp02, DNp11        | B |
| 3018526 | SS02534 | BJD_110D01_BB_21-x-BJD_124C05_AV_01 | DNp02, DNp11        | B |
| 3007650 | SS00729 | GMR_58G11_XA_21-x-GMR_81D05_XD_01   | DNp20               | B |
| 3015818 | SS01057 | GMR_20C05_XA_21-x-GMR_85H06_AV_01   | DNp20               | B |
| 3016889 | SS01590 | GMR_20C03_XA_21-x-GMR_31B08_XD_01   | DNp27               | B |
| 3016886 | SS01587 | GMR_11H10_XA_21-x-BJD_104F07_AV_01  | DNp28               | B |
| 3015827 | SS01066 | GMR_30C12_XA_21-x-GMR_22D06_XD_01   | DNp03               | B |
| 3015842 | SS01081 | GMR_91C05_XA_21-x-GMR_31B08_XD_01   | DNp03               | B |
| 3016858 | SS01559 | GMR_29F12_XA_21-x-GMR_88C07_XD_01   | DNp03               | B |
| 3018285 | SS02382 | GMR_91C05_XA_21-x-GMR_37G07_XD_01   | DNp03               | B |
| 3018297 | SS02394 | GMR_61H01_XA_21-x-GMR_82C10_AV_01   | DNp32               | B |
| 3013846 | SS00934 | BJD_127A08_BB_21-x-BJD_105D02_AV_01 | DNp04               | B |
| 3007646 | SS00725 | GMR_50D07_XA_21-x-GMR_33H11_XD_01   | DNp04               | B |
| 3013775 | SS00865 | BJD_104B02_BB_21-x-BJD_103C12_AV_01 | DNp05               | B |
| 3015808 | SS01047 | BJD_107A12_BB_21-x-BJD_124C05_AV_01 | DNp06               | B |
| 3018646 | SS02612 | BJD_118E07_BB_21-x-BJD_103C12_AV_01 | DNp07               | B |
| 3016848 | SS01549 | BJD_113F07_BB_21-x-BJD_103C12_AV_01 | DNp07, DNp13        | B |
| 3016881 | SS01582 | BJD_117H04_BB_21-x-BJD_114A11_AV_01 | DNb04               | C |
| 3016880 | SS01581 | BJD_116F08_BB_21-x-BJD_102D12_AV_01 | DNp13, DNp29        | C |
| 3015823 | SS01062 | GMR_24A03_XA_21-x-GMR_74C01_XD_01   | Empty brain control | A |

### Supplementary Table 3. DN Split-GAL4 lines generated and used in this study.

Quality A, sparse lines without background expression; Quality B, lines with a few background expression; Quality C, lines with background expression.

| Citation   | Cell type   | Robot ID | LineName | Split pair                          |
|------------|-------------|----------|----------|-------------------------------------|
| Fig 4-S1 A | mnb1        | 3021403  | SS04528  | GMR_16E11_XA_21-x-GMR_21C11_XD_01   |
| Fig 4-S1 B | mnb2        | 3007658  | SS00737  | GMR_10A12_XA_21-x-GMR_81E05_XD_01   |
| Fig 4-S1 C | DVM         | 3007658  | SS00737  | GMR_10A12_XA_21-x-GMR_81E05_XD_01   |
| Fig 4-S1 D | interneuron | 3021403  | SS04528  | GMR_16E11_XA_21-x-GMR_21C11_XD_01   |
| Fig 4-S1 E | interneuron | 3025428  | SS31976  | GMR_18A05_BB_21-x-BJD_111F03_AV_01  |
| Fig 4-S2 A | TTMn        | 3018673  | SS02623  | BJD_110A03_BB_21-x-BJD_103B10_AV_01 |
| Fig 4-S2 B | PSI         | 3003982  | VT049105 | -                                   |
| Fig 4-S2 C | interneuron | 3003982  | VT049105 | -                                   |
| Fig 4-S2 D | interneuron | 3018678  | SS02628  | BJD_119F12_BB_21-x-BJD_127F04_AV_01 |
| Fig 4-S2 E | III1mn      | 3016891  | SS01592  | GMR_26E02_XA_21-x-GMR_81D05_XD_01   |

**Supplementary Table 4. Inter- and motor neuron split-GAL4 lines generated in this study.**



| Robot ID | LineName | Genotype stock name                  | DN type                    | quality |
|----------|----------|--------------------------------------|----------------------------|---------|
| 3007645  | SS00724  | GMR_31B08_XA_21-x-GMR_24A03_XD_01    | DNp03, DNp28, DNp02        | C       |
| 3007649  | SS00728  | GMR_25C08_XA_21-x-GMR_79H02_XD_01    | DNp01                      | C       |
| 3007654  | SS00733  | GMR_58E07_XA_21-x-GMR_39H12_XD_01    | DNp31                      | C       |
| 3007655  | SS00734  | GMR_73C04_XA_21-x-GMR_39H12_XD_01    | DNb05                      | C       |
| 3007657  | SS00736  | GMR_21A07_XA_21-x-GMR_72A01_XD_01    | DNa05                      | C       |
| 3007658  | SS00737  | GMR_10A12_XA_21-x-GMR_81E05_XD_01    | DNp20, DNp22               | C       |
| 3007659  | SS00738  | GMR_81D05_XA_21-x-GMR_81E05_XD_01    | DNp03, DNp18, DNp20, DNp22 | C       |
| 3015809  | SS01048  | BJD_108B07_BB_21-x-BJD_102G01_AV_01  | DNd01                      | C       |
| 3015819  | SS01058  | GMR_21C05_XA_21-x-GMR_28E01_XD_01    | DNg09                      | A       |
| 3015826  | SS01065  | GMR_30C01_BB_21-x-GMR_85H01_XD_01    | DNp04                      | C       |
| 3015828  | SS01067  | GMR_31B08_XA_21-x-GMR_88C07_XD_01    | DNp03                      | D       |
| 3015829  | SS01068  | GMR_32C05_XA_21-x-GMR_70C05_XD_01    | DNd02, DNd03               | D       |
| 3015831  | SS01070  | GMR_38H06_XA_21-x-GMR_65D06_AV_01    | DNa10                      | C       |
| 3015832  | SS01071  | GMR_40H12_XA_21-x-GMR_85H01_XD_01    | DNp04, DNp20               | C       |
| 3015833  | SS01072  | GMR_42B02_XA_21-x-GMR_65C02_XD_01    | DNg07                      | B       |
| 3015837  | SS01076  | GMR_50D07_XA_21-x-GMR_74C01_XD_01    | DNp04?                     | C       |
| 3016847  | SS01548  | BJD_112C12_BB_21-x-BJD_104A01_AV_01  | DNd02, DNd03               | D       |
| 3016850  | SS01551  | BJD_114G06_BB_21-x-BJD_118A10_AV_01  | DNg01                      | C       |
| 3016854  | SS01555  | GMR_10A07_XA_21-x-BJD_104F07_AV_01   | DNp27                      | C       |
| 3016867  | SS01568  | GMR_91C05_XA_21-x-GMR_10A12_XD_01    | DNp20                      | C       |
| 3016873  | SS01574  | BJD_108F02_BB_21-x-BJD_114C04_AV_01  | DNg28                      | B       |
| 3016882  | SS01583  | BJD_119F04_BB_21-x-BJD_100H11_AV_01  | DNp11, DNp28               | C       |
| 3016883  | SS01584  | BJD_123F06_BB_21-x-GMR_32B03_XD_01   | DNg15                      | C       |
| 3016884  | SS01585  | GMR_10A07_XA_21-x-GMR_24D07_XD_01    | DNp27                      | C       |
| 3016891  | SS01592  | GMR_26E02_XA_21-x-GMR_81D05_XD_01    | DNp18, DNp22               | C       |
| 3016893  | SS01594  | GMR_29F12_XA_21-x-GMR_24A03_XD_01    | DNp02, DNp03, DNp28        | C       |
| 3016894  | SS01595  | GMR_29F12_XA_21-x-GMR_31B08_XD_01    | DNp03                      | C       |
| 3016897  | SS01598  | GMR_42B02_XA_21-x-BJD_106H06_AV_01   | DNg06                      | C       |
| 3016898  | SS01599  | GMR_47D05_XA_21-x-GMR_39H12_XD_01    | DNa04                      | C       |
| 3016900  | SS01601  | GMR_59B10_XA_21-x-GMR_21H11_XD_01    | DNb02                      | C       |
| 3016902  | SS01603  | GMR_72H09_XA_21-x-BJD_118A10_AV_01   | DNg01                      | C       |
| 3016904  | SS01605  | GMR_77H03_XA_21-x-GMR_74B04_XD_01    | DNb01                      | C       |
| 3018126  | SS02260  | BJD_106H06_BB_21-x-BJD_112B02_AV_01  | DNg06                      | C       |
| 3018533  | SS02541  | BJD_123E03_BB_21-x-BJD_121E05_AV_01  | DNg01                      | D       |
| 3018537  | SS02545  | GMR_22C05_BB_21-x-BJD_126F02_AV_01   | DNa02                      | C       |
| 3018547  | SS02555  | GMR_81C11_BB_21-x-BJD_126F01_AV_01   | DNg11                      | C       |
| 3018644  | SS02610  | BJD_113F07_BB_21-x-BJD_116F09_AV_01  | DNp13                      | B       |
| 3018655  | SS02621  | GMR_58E07_BB_21-x-GMR_30C01_AV_01    | DNp31                      | C       |
| 3020784  | SS04160  | GMR_38H06_XA_21-x-GMR_50B07_XD_01    | DNg14                      | B       |
| 3021403  | SS04528  | GMR_19G08_BB_21-x-GMR_47F01_XD_01    | DNg06                      | C       |
| 3021405  | SS04530  | GMR_40F04_BB_21-x-GMR_83B06_AV_01    | DNc01, DNc02               | B       |
| 3023061  | SS05089  | BJD_118C08_BB_21-x-GMR_65C10_AV_01   | DNg02                      | B       |
| 3022546  | SS05099  | GMR_44A07_BB_21-x-BJD_128H06_AV_01   | DNg28                      | B       |
| 3023052  | SS05107  | BJD_110C03_BB_21-x- BJD_118C08_AV_01 | DNg02                      | B       |
| 3023055  | SS05116  | BJD_118C08_BB_21-x- BJD_110C03_AV_01 | DNg02                      | B       |
| 3023059  | SS05122  | BJD_118C08_BB_21-x- BJD_123E03_AV_01 | DNg031                     | B       |
| 3023059  | SS05122  | BJD_118C08_BB_21-x-BJD_123E03_AV_01  | DNg01                      | A       |

**Supplementary Table 5. More broadly expressing DN split-GAL4 lines made in this study.**

These lines were not used in the present analysis.

| Category | Abbreviation  | Full nema                                           |
|----------|---------------|-----------------------------------------------------|
| Brain    | AL            | antennal lobe                                       |
|          | ACA           | accessory calyx                                     |
|          | ALA           | accessory medulla                                   |
|          | AMMC          | antenna-mechanosensory motor center                 |
|          | AOTU          | anterior optic tubercle                             |
|          | AVLP          | anterior ventral protocerebrum                      |
|          | ATL           | antler                                              |
|          | BU            | bulb                                                |
|          | CA            | calyx                                               |
|          | CAN           | cantle                                              |
|          | CNG           | cerebral ganglia                                    |
|          | CX            | central complex                                     |
|          | CRE           | crepine                                             |
|          | EB            | ellipsoid body                                      |
|          | EPA           | epaullete                                           |
|          | FB            | fan-shaped body                                     |
|          | FLA           | flange                                              |
|          | GNG           | gnathal ganglia                                     |
|          | GOR           | gorget                                              |
|          | IB            | inferior bridge                                     |
|          | ICL           | inferior clamp                                      |
|          | IPS           | inferior posterior slope                            |
|          | LC            | lobula columnar cell                                |
|          | LAL           | lateral accessory lobe                              |
|          | LH            | lateral horn                                        |
|          | LO            | lobula                                              |
|          | LOP           | lobula plate                                        |
|          | LPLC          | lobula plate columnar cell                          |
|          | MB            | mushroom body                                       |
|          | ML            | medial lobe                                         |
|          | ME            | medulla                                             |
|          | NO            | noduli                                              |
|          | PED           | pedunculus                                          |
|          | PLP           | posterior lateral protocerebrum                     |
|          | PVLP          | posterior ventral protocerebrum                     |
|          | PB            | protocerebral bridge                                |
|          | PRW           | proaw                                               |
|          | SAD           | saddle                                              |
|          | SCL           | superior clamp                                      |
|          | SIP           | superior inferior protocerebrum                     |
|          | SLP           | superior lateral protocerebrum                      |
|          | SMP           | superior medial protocerebrum                       |
|          | SPS           | superior posterior slope                            |
| VL       | vertical lobe |                                                     |
| VES      | vest          |                                                     |
| WED      | wedge         |                                                     |
| VNC      | AMN           | accessory mesothoracic neuromere                    |
|          | AS            | abdominal segment                                   |
|          | DLT           | dorsal lateral tract of dorsal cervical fasciculus  |
|          | DLV           | dorsal lateral tract of ventral cervical fasciculus |
|          | HN            | halter neuropil                                     |
|          | ITD           | intermediate tract of dorsal cervical fasciculus    |
|          | MDA           | median dorsal abdominal tract                       |
|          | MN            | mesothoracic neuromere                              |
|          | MTD           | median tract of dorsal cervical fasciculus          |
|          | MtN           | metathoracic neuromere                              |
|          | mVAC          | medial ventral association center                   |
|          | NN            | neck motor neuropil                                 |
|          | PN            | prothoracic neuromere                               |
|          | VAC           | ventral association center                          |
|          | VLT           | ventral lateral tract                               |
|          | VNC           | ventral nerve cord                                  |
|          | VTV           | ventral median tract of ventral cervical fasciculus |
| WN       | wing neuropil |                                                     |

**Supplementary Table 6. Abbreviations used.**

## Additional References for Supplementary Table 2

- Alekseyenko OV, Lee C, Kravitz EA (2010) Targeted manipulation of serotonergic neurotransmission affects the escalation of aggression in adult male *Drosophila melanogaster*. PLoS One 5:e10806.
- Busch S, Selcho M, Ito K, Tanimoto H (2009) A map of octopaminergic neurons in the *Drosophila* brain. J Comp Neurol 513:643-667.
- Gronenberg W, Strausfeld NJ (1992) Premotor descending neurons responding selectively to local visual stimuli in flies. J Comp Neurol 316:87-103.
- Hampel S, Franconville R, Simpson JH, Seeds AM (2015) A neural command circuit for grooming movement control. Elife 4:e08758.
- Ito M, Masuda N, Shinomiya K, Endo K, Ito K (2013) Systematic analysis of neural projections reveals clonal composition of the *Drosophila* brain. Curr Biol 23:644-655.
- Jai YY, Kanai MI, Demir E, Jefferis GS, Dickson BJ (2010) Cellular organization of the neural circuit that drives *Drosophila* courtship behavior. Curr Biol 20:1602-1614.
- Jiang H, Lkhagva A, Daubnerová I, Chae HS, Šimo L, Jung SH, Yoon YK, Lee NR, Seong JY, Žitňan D, Park Y, Kim YJ (2013) Natalisin, a tachykinin-like signaling system, regulates sexual activity and fecundity in insects. Proc Natl Acad Sci USA 110:E3526-2524.
- Kimura, K. I., Hachiya, T., Koganezawa, M., Tazawa, T., & Yamamoto, D. (2008) Fruitless and doublesex coordinate to generate male-specific neurons that can initiate courtship. Neuron 59:759-769.
- Lee, D., Orchard, I., & Lange, A. B. (2013) Evidence for a conserved CCAP-signaling pathway controlling ecdysis in a hemimetabolous insect, *Rhodnius prolixus*. Front Neurosci, 7:207.
- Matsuo, E., Seki, H., Asai, T., Morimoto, T., Miyakawa, H., Ito, K., & Kamikouchi, A. (2016) Organization of projection neurons and local neurons of the primary auditory center in the fruit fly *Drosophila melanogaster*. J Comp Neurol 524:1099-1164.
- Melcher C, Pankratz MJ (2005) Candidate gustatory interneurons modulating feeding behavior in the *Drosophila* brain. PLoS Biol 3:e305.
- Milde JJ, Strausfeld NJ (1990) Cluster organization and response characteristics of the giant fiber pathway of the blowfly *Calliphora erythrocephala*. J Comp Neurol 294:59-75.

- Mu L, Bacon JP, Ito K, Strausfeld NJ (2014) Responses of *Drosophila* giant descending neurons to visual and mechanical stimuli. *J Exp Biol* 217:2121-2129.
- Nässel DR (1993) Neuropeptides in the insect brain: a review. *Cell Tissue Res* 273:1-29.
- Nässel DR, Högmo O, Hallberg E (1984) Antennal receptors in the blowfly *Calliphora erythrocephala*. I. The gigantic central projection of the pedicellar campaniform sensillum. *J Morphol* 180:159-169.
- Nässel DR, Strausfeld NJ (1982) A pair of descending neurons with dendrites in the optic lobes projecting directly to thoracic ganglia of dipterous insects. *Cell Tissue Res* 226:355-362.
- Stocker RF, Lienhard MC, Borst A, Fischbach KF (1990) Neuronal architecture of the antennal lobe in *Drosophila melanogaster*. *Cell Tissue Res* 262:9-34.
- Strausfeld NJ, Bassemir UK (1985) Lobula plate and ocellar interneurons converge onto a cluster of descending neurons leading to neck and leg motor neuropil in *Calliphora erythrocephala*. *Cell Tissue Res* 240:617-640.
- Suver MP, Huda A, Iwasaki N, Safarik S, Dickinson MH (2016) An array of descending visual interneurons encoding self-motion in *Drosophila*. *J Neurosci* 36:11768-11780.
- Tanaka NK, Endo K, Ito K (2012) Organization of antennal lobe-associated neurons in adult *Drosophila melanogaster* brain. *J Comp Neurol* 520:4067-4130.
- Vaughan AG, Zhou C, Manoli DS, Baker BS (2014) Neural pathways for the detection and discrimination of conspecific song in *D. melanogaster*. *Curr Biol* 24:1039-1049.
